# Supplementary material for: Benchmarking acetylthiophene derivatives: methyl internal rotations in the microwave spectrum of 2-acetyl-5-methylthiophene
Source: Royal Society of Chemistry journal article supplement (doi:10.1039/d2cp03897h), 2022-11-14
Supplement: d2cp03897h1.pdf [file d2cp03897h1.pdf]

**Table S-1:** Coefficients of the one-dimensional Fourier expansion for the potential energy curves of 2A4MT given in Figure 2 calculated at the MP2/6-31G(d,p) level of theory. The potential is expanded as  $V(\varphi) = \sum_{i=0}^5 a_i f_i$ .

| $i$ | $f_i$          | $a_i / \text{Hartree}$ | $a_i / \text{cm}^{-1}$ |
|-----|----------------|------------------------|------------------------|
| 0   | 1              | -743.36102813          |                        |
| 1   | $\cos 1\alpha$ | -0.000721750           | -158.4                 |
| 2   | $\cos 2\alpha$ | -0.006602747           | -1449.2                |
| 3   | $\cos 3\alpha$ | -0.000293569           | -64.4                  |
| 4   | $\cos 4\alpha$ | 0.000439625            | 96.5                   |
| 5   | $\cos 5\alpha$ | -0.000066190           | -14.5                  |

**Table S-2:** Nuclear coordinates in the principal axis system of *syn*-2A5MT and *anti*-2A5MT calculated at the MP2/6-311++G(d,p) level of theory (for atom numbering see Figure 1).

|            | <i>syn</i> -2A5MT |                  |                  | <i>anti</i> -2A5MT |                  |                  |
|------------|-------------------|------------------|------------------|--------------------|------------------|------------------|
|            | $a / \text{\AA}$  | $b / \text{\AA}$ | $c / \text{\AA}$ | $a / \text{\AA}$   | $b / \text{\AA}$ | $c / \text{\AA}$ |
| <b>S1</b>  | 0.633959          | -1.010491        | -0.000088        | -0.611102          | -1.015933        | 0.000059         |
| <b>C2</b>  | -0.564937         | 0.232994         | 0.000042         | 0.561539           | 0.257459         | 0.000013         |
| <b>C3</b>  | 0.017715          | 1.490700         | -0.000031        | -0.057695          | 1.494956         | 0.000063         |
| <b>C4</b>  | 1.427528          | 1.433507         | -0.000095        | -1.464250          | 1.401443         | 0.000048         |
| <b>C5</b>  | 1.917932          | 0.140589         | -0.000129        | -1.928946          | 0.099237         | -0.000006        |
| <b>C6</b>  | -1.985912         | -0.141843        | 0.000042         | 2.022440           | 0.038248         | -0.000003        |
| <b>O7</b>  | -2.327220         | -1.327833        | 0.000011         | 2.790051           | 1.001974         | -0.000086        |
| <b>C8</b>  | -3.000748         | 0.979643         | 0.000083         | 2.532029           | -1.385022        | -0.000014        |
| <b>C9</b>  | 3.352687          | -0.286808        | 0.000227         | -3.350664          | -0.368558        | -0.000118        |
| <b>H10</b> | 3.596419          | -0.878304        | 0.882748         | -3.579192          | -0.967367        | -0.881844        |
| <b>H11</b> | 3.992378          | 0.594172         | -0.002335        | -4.012277          | 0.496066         | 0.000136         |
| <b>H12</b> | 3.595536          | -0.882770        | -0.879514        | -3.579165          | -0.967860        | 0.881278         |
| <b>H13</b> | 2.073683          | 2.300829         | -0.000153        | -2.132887          | 2.251577         | 0.000055         |
| <b>H14</b> | -0.554664         | 2.407808         | -0.000048        | 0.515442           | 2.410700         | 0.000086         |
| <b>H15</b> | -2.873377         | 1.608201         | 0.881088         | 2.173164           | -1.918592        | 0.880557         |
| <b>H16</b> | -3.996135         | 0.545438         | 0.000143         | 3.617934           | -1.368476        | -0.000193        |
| <b>H17</b> | -2.873474         | 1.608169         | -0.880959        | 2.172869           | -1.918714        | -0.880389        |

**Table S-3a:** Rotational constants and the dihedral angle  $\alpha$  of *syn*-2A4MT optimized at various levels of theory. The deviations between the calculated and the experimental values of the rotational constants are given as  $\Delta A$ ,  $\Delta B$  and  $\Delta C$ .  $V_{3,1}$  is the barrier of the acetyl methyl and  $V_{3,2}$  that of the ring methyl group. All optimizations were performed under full-symmetry relaxation.

| Method/Basis Set           | $A /$<br>MHz | $\Delta A /$<br>MHz | $B /$<br>MHz | $\Delta B /$<br>MHz | $C /$<br>MHz | $\Delta C /$<br>MHz | $V_{3,1} /$<br>cm <sup>-1</sup> | $\Delta V_{3,1} /$<br>cm <sup>-1</sup> | $V_{3,2} /$<br>cm <sup>-1</sup> | $\Delta V_{3,2} /$<br>cm <sup>-1</sup> | $\alpha /$<br>° | Planar |
|----------------------------|--------------|---------------------|--------------|---------------------|--------------|---------------------|---------------------------------|----------------------------------------|---------------------------------|----------------------------------------|-----------------|--------|
| B3LYP-D3/6-31G(d,p)        | 3418.3619    | -29.3               | 918.3812     | -8.6                | 730.4766     | -7.1                | 282.5                           | 19.3                                   | 219.5                           | -62.2                                  | 0.03            | Yes    |
| B3LYP-D3/6-31+G(d,p)       | 3415.9261    | -31.7               | 915.4731     | -11.5               | 728.5392     | -9.0                | 216.6                           | 85.2                                   | 214.7                           | -57.4                                  | 0.00            | Yes    |
| B3LYP-D3/6-31++G(d,p)      | 3415.9593    | -31.7               | 915.4634     | -11.6               | 728.5349     | -9.0                | 214.9                           | 86.9                                   | 215.3                           | -58.0                                  | 0.00            | Yes    |
| B3LYP-D3/6-311G(d,p)       | 3431.1657    | -16.5               | 919.7186     | -7.3                | 731.8976     | -5.6                | 272.9                           | 28.9                                   | 196.3                           | -39.0                                  | 0.03            | Yes    |
| B3LYP-D3/6-311+G(d,p)      | 3430.6772    | -16.9               | 918.1648     | -8.9                | 730.8941     | -6.6                | 227.2                           | 74.6                                   | 197.2                           | -39.9                                  | -0.04           | Yes    |
| B3LYP-D3/6-311++G(d,p)     | 3430.6089    | -17.0               | 918.1501     | -8.9                | 730.8818     | -6.7                | 227.1                           | 74.7                                   | 209.4                           | -52.1                                  | -0.04           | Yes    |
| B3LYP-D3/6-311G(2d,2p)     | 3448.4943    | 0.9                 | 922.4506     | -4.6                | 734.3722     | -3.2                | 292.3                           | 9.5                                    | 168.3                           | -11.0                                  | 0.04            | Yes    |
| B3LYP-D3/6-311+G(2d,2p)    | 3447.3820    | -0.2                | 921.5052     | -5.5                | 733.7264     | -3.8                | 237.2                           | 64.6                                   | 170.4                           | -13.1                                  | 0.00            | Yes    |
| B3LYP-D3/6-311G(df,pd)     | 3443.4749    | -4.1                | 921.9676     | -5.1                | 733.8649     | -3.7                | 262.7                           | 39.1                                   | 194.9                           | -37.6                                  | -0.04           | Yes    |
| B3LYP-D3/6-311+G(df,pd)    | 3443.1506    | -4.5                | 920.5616     | -6.5                | 732.9595     | -4.6                | 217.8                           | 84.0                                   | 192.9                           | -35.6                                  | -0.04           | Yes    |
| B3LYP-D3/6-311++G(df,pd)   | 3443.2000    | -4.4                | 920.5383     | -6.5                | 732.9462     | -4.6                | 212.2                           | 89.6                                   | 198.1                           | -40.8                                  | -0.04           | Yes    |
| B3LYP-D3/6-311++G(2d,2p)   | 3447.2525    | -0.4                | 921.5282     | -5.5                | 733.7355     | -3.8                | 239.6                           | 62.2                                   | 174.1                           | -16.8                                  | 0.00            | Yes    |
| B3LYP-D3/6-311G(2df,2pd)   | 3456.8451    | 9.2                 | 924.3065     | -2.7                | 735.9243     | -1.6                | 295.9                           | 5.9                                    | 155.5                           | 1.8                                    | 0.02            | Yes    |
| B3LYP-D3/6-311+G(2df,2pd)  | 3455.7159    | 8.1                 | 923.0726     | -3.9                | 735.0944     | -2.4                | 241.2                           | 60.6                                   | 158.2                           | -0.9                                   | 0.00            | Yes    |
| B3LYP-D3/6-311++G(2df,2pd) | 3455.6563    | 8.0                 | 923.0699     | -4.0                | 735.0905     | -2.4                | 243.8                           | 58.0                                   | 163.1                           | -5.8                                   | 0.00            | Yes    |
| B3LYP-D3/6-311G(3df,3pd)   | 3461.6822    | 14.1                | 924.7836     | -2.2                | 736.4519     | -1.1                | 279.8                           | 22.0                                   | 149.2                           | 8.1                                    | 0.00            | Yes    |
| B3LYP-D3/6-311+G(3df,3pd)  | 3459.5610    | 11.9                | 924.3036     | -2.7                | 736.0521     | -1.5                | 251.7                           | 50.1                                   | 156.8                           | 0.5                                    | 0.00            | Yes    |
| B3LYP-D3/6-311++G(3df,3pd) | 3459.5068    | 11.9                | 924.3083     | -2.7                | 736.0523     | -1.5                | 251.2                           | 50.6                                   | 157.0                           | 0.3                                    | 0.00            | Yes    |
| B3LYP-D3/cc-pVDZ           | 3405.5805    | -42.0               | 916.6983     | -10.3               | 728.9029     | -8.6                | 334.9                           | -33.1                                  | 195.7                           | -38.4                                  | 0.00            | Yes    |
| B3LYP-D3/aug-cc-pVDZ       | 3408.6021    | -39.0               | 914.5675     | -12.5               | 727.6775     | -9.9                | 236.0                           | 65.8                                   | 195.1                           | -37.8                                  | 0.00            | Yes    |
| B3LYP-D3/cc-pVTZ           | 3452.1936    | 4.6                 | 922.9304     | -4.1                | 734.8454     | -2.7                | 254.4                           | 47.4                                   | 172.1                           | -14.8                                  | 0.00            | Yes    |
| B3LYP-D3/aug-cc-pVTZ       | 3452.6106    | 5.0                 | 922.5850     | -4.4                | 734.6462     | -2.9                | 238.0                           | 63.8                                   | 169.2                           | -11.9                                  | 0.00            | Yes    |
| B3LYP-D3BJ/6-31G(d,p)      | 3418.6813    | -28.9               | 921.8194     | -5.2                | 732.6629     | -4.9                | 249.0                           | 52.8                                   | 200.4                           | -43.1                                  | 0.00            | Yes    |

|                                  |                  |             |                 |             |                 |             |              |              |              |              |              |            |
|----------------------------------|------------------|-------------|-----------------|-------------|-----------------|-------------|--------------|--------------|--------------|--------------|--------------|------------|
| B3LYP-D3BJ/6-31+G(d,p)           | 3416.6542        | -31.0       | 918.9596        | -8.1        | 730.7763        | -6.8        | 181.7        | 120.1        | 196.0        | -38.7        | 0.00         | Yes        |
| B3LYP-D3BJ/6-31++G(d,p)          | 3416.6880        | -30.9       | 918.9506        | -8.1        | 730.7725        | -6.8        | 179.8        | 122.0        | 196.5        | -39.2        | 0.00         | Yes        |
| B3LYP-D3BJ/6-311G(d,p)           | 3432.3884        | -15.2       | 923.1190        | -3.9        | 734.1031        | -3.4        | 239.4        | 62.4         | 176.5        | -19.2        | 0.02         | Yes        |
| B3LYP-D3BJ/6-311+G(d,p)          | 3431.3484        | -16.3       | 921.6454        | -5.4        | 733.1266        | -4.4        | 191.6        | 110.2        | 177.4        | -20.1        | 0.00         | Yes        |
| B3LYP-D3BJ/6-311++G(d,p)         | 3431.3484        | -16.3       | 921.6454        | -5.4        | 733.1266        | -4.4        | 191.5        | 110.3        | 189.6        | -32.3        | 0.00         | Yes        |
| <b>B3LYP-D3BJ/6-311G(2d,2p)</b>  | <b>3448.6950</b> | <b>1.1</b>  | <b>926.0056</b> | <b>-1.0</b> | <b>736.6312</b> | <b>-0.9</b> | <b>259.3</b> | <b>42.5</b>  | <b>147.8</b> | <b>9.5</b>   | <b>-0.01</b> | <b>Yes</b> |
| <b>B3LYP-D3BJ/6-311+G(2d,2p)</b> | <b>3447.5436</b> | <b>-0.1</b> | <b>925.0572</b> | <b>-2.0</b> | <b>735.9810</b> | <b>-1.6</b> | <b>201.9</b> | <b>99.9</b>  | <b>149.7</b> | <b>7.6</b>   | <b>-0.01</b> | <b>Yes</b> |
| B3LYP-D3BJ/6-311++G(2d,2p)       | 3447.4083        | -0.2        | 925.0767        | -1.9        | 735.9877        | -1.5        | 204.4        | 97.4         | 153.4        | 3.9          | -0.01        | Yes        |
| B3LYP-D3BJ/6-311G(df,pd)         | 3443.5927        | -4.0        | 925.3976        | -1.6        | 736.0399        | -1.5        | 228.3        | 73.5         | 174.9        | -17.6        | 0.00         | Yes        |
| B3LYP-D3BJ/6-311+G(df,pd)        | 3443.3558        | -4.3        | 924.0092        | -3.0        | 735.1515        | -2.4        | 181.6        | 120.2        | 173.0        | -15.7        | 0.02         | Yes        |
| B3LYP-D3BJ/6-311++G(df,pd)       | 3443.3907        | -4.2        | 923.9910        | -3.0        | 735.1409        | -2.4        | 176.0        | 125.8        | 178.0        | -20.7        | 0.02         | Yes        |
| B3LYP-D3BJ/6-311G(2df,2pd)       | 3456.3326        | 8.7         | 927.7737        | 0.8         | 738.0961        | 0.6         | 262.2        | 39.6         | 134.7        | 22.6         | 0.00         | Yes        |
| B3LYP-D3BJ/6-311+G(2df,2pd)      | 3455.4266        | 7.8         | 926.6364        | -0.4        | 737.3373        | -0.2        | 205.7        | 96.1         | 137.3        | 20.0         | 0.00         | Yes        |
| B3LYP-D3BJ/6-311++G(2df,2pd)     | 3455.3680        | 7.7         | 926.6342        | -0.4        | 737.3337        | -0.2        | 208.2        | 93.6         | 142.2        | 15.1         | 0.00         | Yes        |
| B3LYP-D3BJ/6-311G(3df,3pd)       | 3461.3764        | 13.8        | 928.3088        | 1.3         | 738.6696        | 1.1         | 246.2        | 55.6         | 128.3        | 29.0         | 0.00         | Yes        |
| B3LYP-D3BJ/6-311+G(3df,3pd)      | 3459.0805        | 11.5        | 927.8741        | 0.9         | 738.2903        | 0.8         | 215.8        | 86.0         | 136.0        | 21.3         | 0.00         | Yes        |
| B3LYP-D3BJ/6-311++G(3df,3pd)     | 3459.0250        | 11.4        | 927.8789        | 0.9         | 738.2906        | 0.8         | 215.4        | 86.4         | 136.1        | 21.2         | 0.00         | Yes        |
| B3LYP-D3BJ/cc-pVDZ               | 3406.3694        | -41.3       | 920.2583        | -6.8        | 731.1857        | -6.3        | 301.3        | 0.5          | 176.0        | -18.7        | 0.00         | Yes        |
| B3LYP-D3BJ/aug-cc-pVDZ           | 3409.4634        | -38.2       | 918.1520        | -8.9        | 729.9816        | -7.6        | 198.6        | 103.2        | 175.0        | -17.7        | 0.01         | Yes        |
| B3LYP-D3BJ/cc-pVTZ               | 3452.0427        | 4.4         | 926.4325        | -0.6        | 737.0548        | -0.5        | 219.3        | 82.5         | 151.4        | 5.9          | 0.00         | Yes        |
| B3LYP-D3BJ/aug-cc-pVTZ           | 3452.2999        | 4.7         | 926.1371        | -0.9        | 736.8804        | -0.7        | 202.1        | 99.7         | 148.3        | 9.0          | 0.00         | Yes        |
| CAM-B3LYP-D3BJ/6-311G(d,p)       | 3469.6977        | 22.1        | 929.1899        | 2.2         | 739.6393        | 2.1         | 264.9        | 36.9         | 178.0        | -20.7        | 0.00         | Yes        |
| CAM-B3LYP-D3BJ/6-311+G(d,p)      | 3469.4404        | 21.8        | 927.6204        | 0.6         | 738.6353        | 1.1         | 217.9        | 83.9         | 181.3        | -24.0        | 0.00         | Yes        |
| CAM-B3LYP-D3BJ/6-311++G(d,p)     | 3469.3630        | 21.7        | 927.6105        | 0.6         | 738.6258        | 1.1         | 218.5        | 83.3         | 193.3        | -36.0        | 0.00         | Yes        |
| CAM-B3LYP-D3BJ/cc-pVDZ           | 3444.2266        | -3.4        | 926.1504        | -0.9        | 736.6390        | -0.9        | 318.5        | -16.7        | 182.2        | -24.9        | 0.00         | Yes        |
| CAM-B3LYP-D3BJ/aug-cc-pVDZ       | 3447.3200        | -0.3        | 923.9464        | -3.1        | 735.3687        | -2.2        | 221.8        | 80.0         | 182.1        | -24.8        | 0.01         | Yes        |
| CAM-B3LYP-D3BJ/cc-pVTZ           | 3489.6607        | 42.0        | 932.4014        | 5.4         | 742.5390        | 5.0         | 244.8        | 57.0         | 157.1        | 0.2          | 0.00         | Yes        |
| CAM-B3LYP-D3BJ/aug-cc-pVTZ       | 3489.8800        | 42.3        | 932.0109        | 5.0         | 742.3022        | 4.8         | 228.3        | 73.5         | 156.0        | 1.3          | 0.00         | Yes        |
| CCSD/cc-pVDZ                     | 3391.1934        | -56.4       | 912.0127        | -15.0       | 725.3503        | -12.2       | 403.7        | -101.9       | 161.3        | -4.0         | 0.01         | Yes        |
| <b>M06-2X/6-31G(d,p)</b>         | <b>3448.3181</b> | <b>0.7</b>  | <b>927.4369</b> | <b>0.4</b>  | <b>737.5813</b> | <b>0.0</b>  | <b>335.3</b> | <b>-33.5</b> | <b>205.7</b> | <b>-48.4</b> | <b>0.00</b>  | <b>Yes</b> |

|                            |                  |             |                 |             |                 |             |              |             |              |              |             |            |
|----------------------------|------------------|-------------|-----------------|-------------|-----------------|-------------|--------------|-------------|--------------|--------------|-------------|------------|
| <b>M06-2X/6-31+G(d,p)</b>  | <b>3446.9602</b> | <b>-0.7</b> | <b>925.1120</b> | <b>-1.9</b> | <b>736.0613</b> | <b>-1.5</b> | <b>278.3</b> | <b>23.5</b> | <b>202.3</b> | <b>-45.0</b> | <b>0.00</b> | <b>Yes</b> |
| <b>M06-2X/6-31++G(d,p)</b> | <b>3446.9427</b> | <b>-0.7</b> | <b>925.1195</b> | <b>-1.9</b> | <b>736.0658</b> | <b>-1.5</b> | <b>277.3</b> | <b>24.5</b> | <b>204.0</b> | <b>-46.7</b> | <b>0.00</b> | <b>Yes</b> |
| M06-2X/6-311G(d,p)         | 3458.5736        | 11.0        | 928.3073        | 1.3         | 738.5914        | 1.1         | 340.2        | -38.4       | 188.4        | -31.1        | 0.01        | Yes        |
| M06-2X/6-311+G(d,p)        | 3458.7617        | 11.1        | 926.9316        | -0.1        | 737.7305        | 0.2         | 306.3        | -4.5        | 193.8        | -36.5        | 0.00        | Yes        |
| M06-2X/6-311++G(d,p)       | 3458.6776        | 11.1        | 926.9272        | -0.1        | 737.7245        | 0.2         | 306.6        | -4.8        | 207.2        | -49.9        | 0.00        | Yes        |
| M06-2X/6-311G(df,pd)       | 3468.7535        | 21.1        | 929.9338        | 2.9         | 740.0689        | 2.5         | 326.2        | -24.4       | 188.4        | -31.1        | 0.00        | Yes        |
| M06-2X/6-311+G(df,pd)      | 3469.1235        | 21.5        | 928.6382        | 1.6         | 739.2640        | 1.7         | 294.0        | 7.8         | 190.6        | -33.3        | 0.00        | Yes        |
| M06-2X/6-311++G(df,pd)     | 3469.1104        | 21.5        | 928.6307        | 1.6         | 739.2586        | 1.7         | 288.0        | 13.8        | 196.3        | -39.0        | 0.01        | Yes        |
| M06-2X/6-311G(3df,3pd)     | 3484.9651        | 37.3        | 932.2561        | 5.2         | 742.2514        | 4.7         | 363.3        | -61.5       | 153.3        | 4.0          | 0.00        | Yes        |
| M06-2X/6-311+G(3df,3pd)    | 3483.0253        | 35.4        | 931.9722        | 4.9         | 741.9841        | 4.5         | 343.2        | -41.4       | 160.2        | -2.9         | 0.01        | Yes        |
| M06-2X/6-311++G(3df,3pd)   | 3482.9696        | 35.3        | 931.9736        | 5.0         | 741.9821        | 4.4         | 343.4        | -41.6       | 160.5        | -3.2         | 0.00        | Yes        |
| M06-2X/cc-pVDZ             | 3438.5948        | -9.0        | 926.2620        | -0.8        | 736.4632        | -1.1        | 362.8        | -61.0       | 186.8        | -29.5        | 0.00        | Yes        |
| M06-2X/aug-cc-pVDZ         | 3441.3354        | -6.3        | 924.1893        | -2.8        | 735.2623        | -2.3        | 297.3        | 4.5         | 188.9        | -31.6        | 0.00        | Yes        |
| M06-2X/cc-pVTZ             | 3476.6829        | 29.1        | 931.3229        | 4.3         | 741.2847        | 3.8         | 324.6        | -22.8       | 167.3        | -10.0        | 0.00        | Yes        |
| M06-2X/aug-cc-pVTZ         | 3477.5311        | 29.9        | 931.0761        | 4.1         | 741.1666        | 3.6         | 316.5        | -14.7       | 169.3        | -12.0        | 0.00        | Yes        |
| MP2/6-31G(d,p)             | 3425.2312        | -22.4       | 927.6229        | 0.6         | 736.5991        | -0.9        | 359.0        | -57.2       | 165.5        | -8.2         | -0.01       | Yes        |
| MP2/6-31+G(d,p)            | 3419.5932        | -28.0       | 924.9485        | -2.1        | 734.6713        | -2.9        | 266.6        | 35.2        | 185.4        | -28.1        | 0.01        | Yes        |
| MP2/6-31++G(d,p)           | 3419.4941        | -28.1       | 924.9131        | -2.1        | 734.6466        | -2.9        | 262.2        | 39.6        | 194.2        | -36.9        | 0.01        | Yes        |
| MP2/6-311G(d,p)            | 3422.6439        | -25.0       | 926.4466        | -0.6        | 735.8002        | -1.7        | 347.3        | -45.5       | 172.8        | -15.5        | -0.01       | Yes        |
| MP2/6-311+G(d,p)           | 3421.5236        | -26.1       | 924.5314        | -2.5        | 734.5427        | -3.0        | 295.6        | 6.2         | 165.0        | -7.7         | -0.01       | Yes        |
| MP2/6-311++G(d,p)          | 3421.4884        | -26.1       | 924.5102        | -2.5        | 734.5289        | -3.0        | 290.8        | 11.0        | 202.1        | -44.8        | -0.02       | Yes        |
| MP2/6-311G(2d,2p)          | 3433.9215        | -13.7       | 928.9467        | 1.9         | 737.8014        | 0.3         | 340.8        | -39.0       | 132.4        | 24.9         | 0.04        | Yes        |
| MP2/6-311+G(2d,2p)         | 3432.7451        | -14.9       | 927.7451        | 0.7         | 736.9930        | -0.5        | 283.3        | 18.5        | 137.0        | 20.3         | 0.03        | Yes        |
| MP2/6-311++G(2d,2p)        | 3432.5457        | -15.1       | 927.7467        | 0.7         | 736.9867        | -0.5        | 287.9        | 13.9        | 138.6        | 18.7         | 0.03        | Yes        |
| MP2/6-311G(df,pd)          | 3448.7375        | 1.1         | 931.6314        | 4.6         | 740.2461        | 2.7         | 326.7        | -24.9       | 177.2        | -19.9        | -0.01       | Yes        |
| MP2/6-311+G(df,pd)         | 3445.5305        | -2.1        | 929.8089        | 2.8         | 738.9522        | 1.4         | 272.0        | 29.8        | 168.3        | -11.0        | -0.02       | Yes        |
| MP2/6-311++G(df,pd)        | 3445.7387        | -1.9        | 929.8698        | 2.8         | 739.0695        | 1.5         | 270.6        | 31.2        | 194.2        | -36.9        | -3.18       | No         |
| MP2/6-311G(2df,2pd)        | 3450.7935        | 3.2         | 934.6498        | 7.6         | 742.1877        | 4.7         | 335.8        | -34.0       | 116.8        | 40.5         | 0.00        | Yes        |
| MP2/6-311+G(2df,2pd)       | 3448.8603        | 1.2         | 933.0737        | 6.1         | 741.1090        | 3.6         | 277.5        | 24.3        | 123.8        | 33.5         | 0.00        | Yes        |
| MP2/6-311++G(2df,2pd)      | 3448.7951        | 1.2         | 933.0566        | 6.0         | 741.0965        | 3.6         | 281.6        | 20.2        | 127.9        | 29.4         | 0.00        | Yes        |

|                               |                  |       |                 |       |                 |       |              |        |              |       |       |     |
|-------------------------------|------------------|-------|-----------------|-------|-----------------|-------|--------------|--------|--------------|-------|-------|-----|
| MP2/6-311G(3df,3pd)           | 3454.6254        | 7.0   | 934.2892        | 7.3   | 742.1542        | 4.6   | 339.2        | -37.4  | 97.4         | 59.9  | -0.03 | Yes |
| MP2/6-311+G(3df,3pd)          | 3451.4295        | 3.8   | 933.6344        | 6.6   | 741.5942        | 4.1   | 295.2        | 6.6    | 108.1        | 49.2  | -0.03 | Yes |
| MP2/6-311++G(3df,3pd)         | 3451.3235        | 3.7   | 933.6862        | 6.7   | 741.6214        | 4.1   | 294.6        | 7.2    | 109.2        | 48.1  | 0.00  | Yes |
| MP2/cc-pVDZ                   | 3382.8111        | -64.8 | 919.1623        | -7.9  | 729.4494        | -8.1  | 406.3        | -104.5 | 166.8        | -9.5  | 0.00  | Yes |
| MP2/aug-cc-pVDZ               | 3373.8306        | -73.8 | 916.4477        | -10.6 | 727.3270        | -10.2 | 271.2        | 30.6   | 152.0        | 5.3   | 0.00  | Yes |
| MP2/cc-pVTZ                   | 3441.6008        | -6.0  | 931.9170        | 4.9   | 740.0479        | 2.5   | 293.6        | 8.2    | 137.9        | 19.4  | 0.00  | Yes |
| $\omega$ B97X-D/6-311G(d,p)   | 3462.6795        | 15.1  | 925.5488        | -1.5  | 737.0348        | -0.5  | 262.7        | 39.1   | 183.4        | -26.1 | 0.00  | Yes |
| $\omega$ B97X-D/6-311+G(d,p)  | 3462.5874        | 15.0  | 925.5358        | -1.5  | 737.0225        | -0.5  | 263.8        | 38.0   | 195.7        | -38.4 | 0.00  | Yes |
| $\omega$ B97X-D/6-311++G(d,p) | 3462.5550        | 14.9  | 926.9501        | -0.1  | 737.9157        | 0.4   | 296.4        | 5.4    | 179.8        | -22.5 | 0.00  | Yes |
| $\omega$ B97X-D/aug-cc-pVDZ   | 3441.0349        | -6.6  | 921.8369        | -5.2  | 733.7647        | -3.8  | 280.4        | 21.4   | 174.6        | -17.3 | 0.02  | Yes |
| $\omega$ B97X-D/aug-cc-pVTZ   | 3483.3105        | 35.7  | 929.6988        | 2.7   | 740.5541        | 3.0   | 283.1        | 18.7   | 154.5        | 2.8   | 0.00  | Yes |
| $\omega$ B97X-D/cc-pVDZ       | 3438.4941        | -9.1  | 923.6269        | -3.4  | 734.7946        | -2.7  | 334.4        | -32.6  | 176.5        | -19.2 | 0.00  | Yes |
| $\omega$ B97X-D/cc-pVTZ       | 3482.9519        | 35.3  | 929.8956        | 2.9   | 740.6620        | 3.1   | 288.8        | 13.0   | 154.9        | 2.4   | 0.00  | Yes |
| <b>Experiment</b>             | <b>3447.6227</b> |       | <b>927.0222</b> |       | <b>737.5335</b> |       | <b>301.8</b> |        | <b>157.3</b> |       |       |     |

**Table S-3b:** Rotational constants, the dihedral angle  $\alpha$  and the predicted torsional barriers of *anti*-2A3MT optimized at various levels of theory. The deviations between the calculated and the experimental values of the rotational constants are given as  $\Delta A$ ,  $\Delta B$ , and  $\Delta C$ .  $V_{3,1}$  is the barrier of the acetyl methyl and  $V_{3,2}$  that of the ring methyl group. All optimizations were performed under full geometry relaxation.

| Method/Basis Set           | A /<br>MHz | $\Delta A$ /<br>MHz | B /<br>MHz | $\Delta B$ /<br>MHz | C /<br>MHz | $\Delta C$ /<br>MHz | $V_{3,1}$ /<br>cm <sup>-1</sup> | $\Delta V_{3,1}$ /<br>cm <sup>-1</sup> | $V_{3,2}$ /<br>cm <sup>-1</sup> | $\Delta V_{3,2}$ /<br>cm <sup>-1</sup> | $\alpha$ /<br>° | Planar |
|----------------------------|------------|---------------------|------------|---------------------|------------|---------------------|---------------------------------|----------------------------------------|---------------------------------|----------------------------------------|-----------------|--------|
| B3LYP-D3/6-31G(d,p)        | 1990.5429  | -7.4                | 1398.6845  | -13.3               | 829.8316   | -6.5                | 306.1                           | 0.1                                    | 253.6                           | 68.2                                   | 179.99          | Yes    |
| B3LYP-D3/6-31+G(d,p)       | 1984.9254  | -13.1               | 1397.2310  | -14.7               | 828.3614   | -7.9                | 243.8                           | 62.4                                   | 334.6                           | -12.8                                  | 179.98          | Yes    |
| B3LYP-D3/6-31++G(d,p)      | 1985.0767  | -12.9               | 1397.2922  | -14.7               | 828.4097   | -7.9                | 240.5                           | 65.7                                   | 338.5                           | -16.7                                  | 179.97          | Yes    |
| B3LYP-D3/6-311G(d,p)       | 1995.3479  | -2.6                | 1401.2186  | -10.7               | 831.5498   | -4.7                | 258.4                           | 47.8                                   | 264.4                           | 57.4                                   | 180.01          | Yes    |
| B3LYP-D3/6-311+G(d,p)      | 1992.0607  | -5.9                | 1401.4298  | -10.5               | 831.0581   | -5.2                | 235.2                           | 71.0                                   | 308.7                           | 13.1                                   | 179.98          | Yes    |
| B3LYP-D3/6-311++G(d,p)     | 1992.0453  | -5.9                | 1401.5310  | -10.4               | 831.0911   | -5.2                | 228.9                           | 77.3                                   | 306.3                           | 15.5                                   | 179.96          | Yes    |
| B3LYP-D3/6-311G(2d,2p)     | 2002.7562  | 4.8                 | 1406.0075  | -6.0                | 834.4760   | -1.8                | 283.7                           | 22.5                                   | 289.8                           | 32.0                                   | 179.98          | Yes    |
| B3LYP-D3/6-311+G(2d,2p)    | 1999.4253  | 1.4                 | 1406.8265  | -5.1                | 834.1922   | -2.1                | 251.9                           | 54.3                                   | 330.0                           | -8.2                                   | 179.99          | Yes    |
| B3LYP-D3/6-311++G(2d,2p)   | 1999.3824  | 1.4                 | 1406.9156  | -5.1                | 834.2164   | -2.1                | 250.8                           | 55.4                                   | 328.2                           | -6.4                                   | 179.97          | Yes    |
| B3LYP-D3/6-311G(df,pd)     | 2001.6341  | 3.7                 | 1405.3576  | -6.6                | 834.0797   | -2.2                | 248.1                           | 58.1                                   | 289.9                           | 31.9                                   | 179.96          | Yes    |
| B3LYP-D3/6-311+G(df,pd)    | 1998.5140  | 0.5                 | 1405.5632  | -6.4                | 833.6124   | -2.7                | 223.2                           | 83.0                                   | 325.2                           | -3.4                                   | 179.94          | Yes    |
| B3LYP-D3/6-311++G(df,pd)   | 1998.5126  | 0.5                 | 1405.6433  | -6.3                | 833.6390   | -2.6                | 217.3                           | 88.9                                   | 321.6                           | 0.2                                    | 179.96          | Yes    |
| B3LYP-D3/6-311G(2df,2pd)   | 2007.5745  | 9.6                 | 1408.9040  | -3.1                | 836.3291   | 0.0                 | 281.5                           | 24.7                                   | 308.4                           | 13.4                                   | 179.99          | Yes    |
| B3LYP-D3/6-311+G(2df,2pd)  | 2004.0825  | 6.1                 | 1409.3829  | -2.6                | 835.8958   | -0.4                | 252.0                           | 54.2                                   | 336.9                           | -15.1                                  | 179.99          | Yes    |
| B3LYP-D3/6-311++G(2df,2pd) | 2004.0704  | 6.1                 | 1409.4280  | -2.5                | 835.9100   | -0.4                | 255.8                           | 50.4                                   | 336.1                           | -14.3                                  | 179.98          | Yes    |
| B3LYP-D3/6-311G(3df,3pd)   | 2009.2155  | 11.2                | 1410.7673  | -1.2                | 837.2723   | 1.0                 | 272.9                           | 33.3                                   | 330.9                           | -9.1                                   | 180.00          | Yes    |
| B3LYP-D3/6-311+G(3df,3pd)  | 2006.4720  | 8.5                 | 1411.4624  | -0.5                | 837.0448   | 0.8                 | 257.4                           | 48.8                                   | 328.3                           | -6.5                                   | 179.97          | Yes    |
| B3LYP-D3/6-311++G(3df,3pd) | 2006.4625  | 8.5                 | 1411.4423  | -0.5                | 837.0356   | 0.7                 | 258.6                           | 47.6                                   | 328.4                           | -6.6                                   | 179.97          | Yes    |
| B3LYP-D3/cc-pVDZ           | 1985.0693  | -12.9               | 1395.8512  | -16.1               | 827.9715   | -8.3                | 328.2                           | -22.0                                  | 264.5                           | 57.3                                   | 179.95          | Yes    |
| B3LYP-D3/aug-cc-pVDZ       | 1981.7207  | -16.3               | 1396.3122  | -15.7               | 827.5401   | -8.7                | 260.4                           | 45.8                                   | 336.6                           | -14.8                                  | 179.98          | Yes    |
| B3LYP-D3/cc-pVTZ           | 2003.6075  | 5.6                 | 1408.3749  | -3.6                | 835.4580   | -0.8                | 267.5                           | 38.7                                   | 309.7                           | 12.1                                   | 179.98          | Yes    |
| B3LYP-D3/aug-cc-pVTZ       | 2002.7443  | 4.8                 | 1408.8215  | -3.1                | 835.4678   | -0.8                | 255.8                           | 50.4                                   | 331.3                           | -9.5                                   | 179.96          | Yes    |
| B3LYP-D3BJ/6-31G(d,p)      | 1989.3355  | -8.6                | 1403.9340  | -8.0                | 831.4701   | -4.8                | 263.4                           | 42.8                                   | 201.5                           | 120.3                                  | 179.97          | Yes    |

|                                   |                  |             |                  |            |                 |             |              |       |       |       |               |            |
|-----------------------------------|------------------|-------------|------------------|------------|-----------------|-------------|--------------|-------|-------|-------|---------------|------------|
| B3LYP-D3BJ/6-31+G(d,p)            | 1983.5530        | -14.4       | 1402.5249        | -9.4       | 829.9829        | -6.3        | 200.3        | 105.9 | 291.5 | 30.3  | 179.99        | Yes        |
| B3LYP-D3BJ/6-31++G(d,p)           | 1983.5890        | -14.4       | 1402.5097        | -9.5       | 829.9838        | -6.3        | 196.7        | 109.5 | 295.2 | 26.6  | 179.99        | Yes        |
| B3LYP-D3BJ/6-311G(d,p)            | 1993.9149        | -4.1        | 1406.6604        | -5.3       | 833.2169        | -3.1        | 212.4        | 93.8  | 215.5 | 106.3 | 179.99        | Yes        |
| B3LYP-D3BJ/6-311+G(d,p)           | 1990.4953        | -7.5        | 1406.7845        | -5.2       | 832.6682        | -3.6        | 188.8        | 117.4 | 265.9 | 55.9  | 179.97        | Yes        |
| B3LYP-D3BJ/6-311++G(d,p)          | 1990.4984        | -7.5        | 1406.9541        | -5.0       | 832.7281        | -3.6        | 182.7        | 123.5 | 263.4 | 58.4  | 180.00        | Yes        |
| B3LYP-D3BJ/6-311G(2d,2p)          | 2001.1254        | 3.1         | 1411.5147        | -0.5       | 836.1318        | -0.2        | 237.3        | 68.9  | 241.3 | 80.5  | 180.00        | Yes        |
| <b>B3LYP-D3BJ/6-311+G(2d,2p)</b>  | <b>1997.6762</b> | <b>-0.3</b> | <b>1412.2869</b> | <b>0.3</b> | <b>835.8065</b> | <b>-0.5</b> | <b>204.7</b> | 101.5 | 287.5 | 34.3  | <b>179.99</b> | <b>Yes</b> |
| <b>B3LYP-D3BJ/6-311++G(2d,2p)</b> | <b>1997.6437</b> | <b>-0.3</b> | <b>1412.3745</b> | <b>0.4</b> | <b>835.8317</b> | <b>-0.5</b> | <b>208.5</b> | 97.7  | 285.7 | 36.1  | <b>179.99</b> | <b>Yes</b> |
| B3LYP-D3BJ/6-311G(df,pd)          | 2000.0432        | 2.1         | 1410.8775        | -1.1       | 835.7468        | -0.5        | 201.0        | 105.2 | 240.8 | 81.0  | 179.99        | Yes        |
| B3LYP-D3BJ/6-311+G(df,pd)         | 1996.7614        | -1.2        | 1411.0030        | -1.0       | 835.2201        | -1.1        | 175.8        | 130.4 | 282.1 | 39.7  | 179.98        | Yes        |
| B3LYP-D3BJ/6-311++G(df,pd)        | 1996.7909        | -1.2        | 1411.0942        | -0.9       | 835.2559        | -1.0        | 170.1        | 136.1 | 278.3 | 43.5  | 179.99        | Yes        |
| B3LYP-D3BJ/6-311G(2df,2pd)        | 2005.7422        | 7.8         | 1414.4533        | 2.5        | 837.9635        | 1.7         | 234.8        | 71.4  | 260.0 | 61.8  | 180.00        | Yes        |
| B3LYP-D3BJ/6-311+G(2df,2pd)       | 2002.2228        | 4.2         | 1414.8468        | 2.9        | 837.4927        | 1.2         | 204.8        | 101.4 | 294.6 | 27.2  | 180.00        | Yes        |
| B3LYP-D3BJ/6-311++G(2df,2pd)      | 2002.2076        | 4.2         | 1414.8985        | 2.9        | 837.5085        | 1.2         | 208.6        | 97.6  | 293.7 | 28.1  | 180.00        | Yes        |
| B3LYP-D3BJ/6-311G(3df,3pd)        | 2007.3432        | 9.4         | 1416.3203        | 4.4        | 838.9013        | 2.6         | 226.4        | 79.8  | 283.9 | 37.9  | 180.00        | Yes        |
| B3LYP-D3BJ/6-311+G(3df,3pd)       | 2004.5105        | 6.5         | 1416.9671        | 5.0        | 838.6376        | 2.3         | 209.8        | 96.4  | 285.2 | 36.6  | 180.00        | Yes        |
| B3LYP-D3BJ/6-311++G(3df,3pd)      | 2004.5158        | 6.5         | 1416.9491        | 5.0        | 838.6317        | 2.3         | 210.9        | 95.3  | 285.3 | 36.5  | 180.00        | Yes        |
| B3LYP-D3BJ/cc-pVDZ                | 1983.7864        | -14.2       | 1401.3538        | -10.6      | 829.6832        | -6.6        | 284.3        | 21.9  | 211.9 | 109.9 | 180.00        | Yes        |
| B3LYP-D3BJ/aug-cc-pVDZ            | 1980.2412        | -17.7       | 1401.7828        | -10.2      | 829.2029        | -7.1        | 215.1        | 91.1  | 294.3 | 27.5  | 179.99        | Yes        |
| B3LYP-D3BJ/cc-pVTZ                | 2001.7832        | 3.8         | 1413.8759        | 1.9        | 837.0754        | 0.8         | 220.9        | 85.3  | 265.4 | 56.4  | 179.99        | Yes        |
| B3LYP-D3BJ/aug-cc-pVTZ            | 2000.8540        | 2.9         | 1414.3229        | 2.4        | 837.0719        | 0.8         | 209.0        | 97.2  | 289.1 | 32.7  | 179.99        | Yes        |
| CAM-B3LYP-D3BJ/6-311G(d,p)        | 2013.3968        | 15.4        | 1415.7122        | 3.7        | 839.7808        | 3.5         | 232.3        | 73.9  | 208.4 | 113.4 | 179.99        | Yes        |
| CAM-B3LYP-D3BJ/6-311+G(d,p)       | 2009.8536        | 11.9        | 1415.8869        | 3.9        | 839.2304        | 2.9         | 209.6        | 96.6  | 260.5 | 61.3  | 180.01        | Yes        |
| CAM-B3LYP-D3BJ/6-311++G(d,p)      | 2009.8346        | 11.9        | 1416.0094        | 4.0        | 839.2699        | 3.0         | 205.5        | 100.7 | 257.6 | 64.2  | 179.99        | Yes        |
| CAM-B3LYP-D3BJ/cc-pVDZ            | 2003.2950        | 5.3         | 1410.0786        | -1.9       | 836.1384        | -0.2        | 296.4        | 9.8   | 188.6 | 133.2 | 179.99        | Yes        |
| CAM-B3LYP-D3BJ/aug-cc-pVDZ        | 1999.5818        | 1.6         | 1410.6008        | -1.4       | 835.6632        | -0.6        | 230.6        | 75.6  | 277.5 | 44.3  | 179.99        | Yes        |
| CAM-B3LYP-D3BJ/aug-cc-pVTZ        | 2020.1182        | 22.1        | 1423.3993        | 11.4       | 843.6086        | 7.3         | 228.1        | 78.1  | 280.4 | 41.4  | 179.99        | Yes        |
| CAM-B3LYP-D3BJ/cc-pVTZ            | 2021.1858        | 23.2        | 1423.0308        | 11.1       | 843.6630        | 7.4         | 240.8        | 65.4  | 255.3 | 66.5  | 179.97        | Yes        |
| CCSD/cc-pVDZ                      | 1970.5678        | -27.4       | 1389.2197        | -22.7      | 823.2340        | -13.1       | 376.8        | -70.6 | 335.8 | -14.0 | 179.96        | Yes        |
| M06-2X/6-31G(d,p)                 | 2006.5618        | 8.6         | 1413.6710        | 1.7        | 837.9107        | 1.6         | 332.9        | -26.7 | 312.1 | 9.7   | 180.00        | Yes        |

|                          |                  |            |                  |             |                 |             |              |              |              |              |               |            |
|--------------------------|------------------|------------|------------------|-------------|-----------------|-------------|--------------|--------------|--------------|--------------|---------------|------------|
| M06-2X/6-31+G(d,p)       | 2001.7245        | 3.7        | 1412.3014        | 0.3         | 836.6018        | 0.3         | 278.0        | 28.2         | 377.6        | -55.8        | 179.99        | Yes        |
| M06-2X/6-31++G(d,p)      | 2001.6981        | 3.7        | 1412.3336        | 0.4         | 836.6083        | 0.3         | 274.5        | 31.7         | 381.4        | -59.6        | 179.99        | Yes        |
| M06-2X/6-311G(d,p)       | 2009.6389        | 11.7       | 1415.9836        | 4.0         | 839.2501        | 3.0         | 305.1        | 1.1          | 340.8        | -19.0        | 180.00        | Yes        |
| M06-2X/6-311+G(d,p)      | 2006.8048        | 8.8        | 1415.9801        | 4.0         | 838.7573        | 2.5         | 292.8        | 13.4         | 372.3        | -50.5        | 179.98        | Yes        |
| M06-2X/6-311++G(d,p)     | 2006.7485        | 8.8        | 1416.1132        | 4.1         | 838.7948        | 2.5         | 288.4        | 17.8         | 369.8        | -48.0        | 180.00        | Yes        |
| M06-2X/6-311G(df,pd)     | 2014.7269        | 16.8       | 1419.2845        | 7.3         | 841.2772        | 5.0         | 292.2        | 14.0         | 358.7        | -36.9        | 179.99        | Yes        |
| M06-2X/6-311+G(df,pd)    | 2012.0969        | 14.1       | 1419.2922        | 7.3         | 840.8209        | 4.5         | 279.0        | 27.2         | 382.8        | -61.0        | 179.99        | Yes        |
| M06-2X/6-311++G(df,pd)   | 2012.0133        | 14.0       | 1419.3965        | 7.4         | 840.8423        | 4.6         | 274.8        | 31.4         | 379.2        | -57.4        | 179.98        | Yes        |
| M06-2X/6-311G(3df,3pd)   | 2021.5796        | 23.6       | 1424.1581        | 12.2        | 844.1515        | 7.9         | 344.0        | -37.8        | 391.0        | -69.2        | 179.96        | Yes        |
| M06-2X/6-311+G(3df,3pd)  | 2019.2558        | 21.3       | 1424.7666        | 12.8        | 843.9641        | 7.7         | 333.8        | -27.6        | 386.4        | -64.6        | 179.98        | Yes        |
| M06-2X/6-311++G(3df,3pd) | 2019.2421        | 21.3       | 1424.7483        | 12.8        | 843.9546        | 7.7         | 335.4        | -29.2        | 386.3        | -64.5        | 179.98        | Yes        |
| M06-2X/cc-pVDZ           | 2002.7737        | 4.8        | 1411.5358        | -0.4        | 836.5816        | 0.3         | 347.1        | -40.9        | 312.1        | 9.7          | 179.98        | Yes        |
| M06-2X/aug-cc-pVDZ       | 1999.9174        | 1.9        | 1411.4927        | -0.5        | 836.0539        | -0.2        | 308.1        | -1.9         | 367.0        | -45.2        | 180.00        | Yes        |
| M06-2X/cc-pVTZ           | 2017.1889        | 19.2       | 1423.0174        | 11.1        | 842.9903        | 6.7         | 325.0        | -18.8        | 364.4        | -42.6        | 179.94        | Yes        |
| M06-2X/aug-cc-pVTZ       | 2016.5849        | 18.6       | 1423.3360        | 11.4        | 842.9959        | 6.7         | 318.5        | -12.3        | 383.7        | -61.9        | 179.98        | Yes        |
| <b>MP2/6-31G(d,p)</b>    | <b>1998.0135</b> | <b>0.0</b> | <b>1411.1488</b> | <b>-0.8</b> | <b>835.4992</b> | <b>-0.8</b> | <b>365.0</b> | <b>-58.8</b> | <b>343.4</b> | <b>-21.6</b> | <b>180.01</b> | <b>Yes</b> |
| MP2/6-31+G(d,p)          | 1991.4849        | -6.5       | 1406.9802        | -5.0        | 834.6421        | -1.6        | 288.2        | 18.0         | 412.8        | -91.0        | 174.06        | No         |
| MP2/6-31++G(d,p)         | 1991.3537        | -6.6       | 1406.0562        | -5.9        | 835.5509        | -0.7        | 303.5        | 2.7          | 394.7        | -72.9        | 173.11        | No         |
| MP2/6-311G(d,p)          | 1994.1937        | -3.8       | 1410.2776        | -1.7        | 834.5987        | -1.7        | 306.9        | -0.7         | 410.8        | -89.0        | 180.02        | Yes        |
| MP2/6-311+G(d,p)         | 1991.4344        | -6.5       | 1407.1605        | -4.8        | 836.0273        | -0.3        | 305.0        | 1.2          | 439.8        | -118.0       | 172.58        | No         |
| MP2/6-311++G(d,p)        | 1991.4877        | -6.5       | 1406.2009        | -5.8        | 836.8944        | 0.6         | 316.1        | -9.9         | 424.8        | -103.0       | 171.47        | No         |
| MP2/6-311G(2d,2p)        | 2000.1514        | 2.2        | 1416.5220        | 4.6         | 837.7125        | 1.4         | 301.0        | 5.2          | 358.8        | -37.0        | 180.00        | Yes        |
| MP2/6-311+G(2d,2p)       | 1996.1020        | -1.9       | 1417.2861        | 5.3         | 837.2749        | 1.0         | 279.7        | 26.5         | 423.5        | -101.7       | 180.01        | Yes        |
| MP2/6-311++G(2d,2p)      | 1996.0517        | -1.9       | 1417.4463        | 5.5         | 837.3241        | 1.0         | 244.3        | 61.9         | 417.2        | -95.4        | 180.01        | Yes        |
| MP2/6-311G(df,pd)        | 2008.5029        | 10.5       | 1419.4563        | 7.5         | 840.5681        | 4.3         | 276.6        | 29.6         | 393.0        | -71.2        | 177.91        | No         |
| MP2/6-311+G(df,pd)       | 2005.5448        | 7.6        | 1414.5150        | 2.5         | 842.3849        | 6.1         | 293.2        | 13.0         | 417.7        | -95.9        | 171.16        | No         |
| MP2/6-311++G(df,pd)      | 2005.4402        | 7.5        | 1414.2446        | 2.3         | 843.0686        | 6.8         | 307.0        | -0.8         | 404.8        | -83.0        | 170.80        | No         |
| MP2/6-311G(2df,2pd)      | 2011.1884        | 13.2       | 1425.1979        | 13.2        | 842.6909        | 6.4         | 295.2        | 11.0         | 359.7        | -37.9        | 179.93        | Yes        |
| MP2/6-311+G(2df,2pd)     | 2006.6522        | 8.7        | 1425.2066        | 13.2        | 841.9037        | 5.6         | 271.3        | 34.9         | 406.5        | -84.7        | 180.00        | Yes        |
| MP2/6-311++G(2df,2pd)    | 2006.6585        | 8.7        | 1425.3283        | 13.4        | 841.9489        | 5.7         | 274.2        | 32.0         | 405.3        | -83.5        | 180.00        | Yes        |



|                               |           |       |           |       |          |       |              |       |              |       |        |     |
|-------------------------------|-----------|-------|-----------|-------|----------|-------|--------------|-------|--------------|-------|--------|-----|
| MP2/6-311G(3df,3pd)           | 2010.2913 | 12.3  | 1425.6410 | 13.7  | 842.7080 | 6.4   | 303.1        | 3.1   | 382.2        | -60.4 | 179.96 | Yes |
| MP2/6-311+G(3df,3pd)          | 2006.8342 | 8.9   | 1425.8502 | 13.9  | 842.1781 | 5.9   | 266.5        | 39.7  | 389.4        | -67.6 | 179.97 | Yes |
| MP2/6-311++G(3df,3pd)         | 2006.8395 | 8.9   | 1425.8420 | 13.9  | 842.1758 | 5.9   | 273.7        | 32.5  | 389.2        | -67.4 | 179.96 | Yes |
| MP2/cc-pVDZ                   | 1975.7803 | -22.2 | 1398.1949 | -13.8 | 827.2509 | -9.0  | 378.2        | -72.0 | 332.7        | -10.9 | 179.99 | Yes |
| MP2/aug-cc-pVDZ               | 1966.2899 | -31.7 | 1398.5114 | -13.5 | 825.7057 | -10.6 | 271.7        | 34.5  | 400.0        | -78.2 | 179.97 | Yes |
| MP2/cc-pVTZ                   | 2003.7456 | 5.8   | 1421.8441 | 9.9   | 840.2247 | 3.9   | 281.5        | 24.7  | 361.4        | -39.6 | 179.96 | Yes |
| MP2/aug-cc-pVTZ               | 2001.9133 | 3.9   | 1422.6234 | 10.7  | 840.1936 | 3.9   | <sup>a</sup> |       | <sup>a</sup> |       | 180.00 | Yes |
| $\omega$ B97X-D/6-311G(d,p)   | 2005.5701 | 7.6   | 1411.6054 | -0.4  | 837.0132 | 0.7   | 232.4        | 73.8  | 285.7        | 36.1  | 180.00 | Yes |
| $\omega$ B97X-D/6-311+G(d,p)  | 2005.5318 | 7.6   | 1411.7392 | -0.2  | 837.0534 | 0.8   | 227.1        | 79.1  | 282.9        | 38.9  | 180.00 | Yes |
| $\omega$ B97X-D/6-311++G(d,p) | 2008.5172 | 10.5  | 1411.5709 | -0.4  | 837.5148 | 1.2   | 248.9        | 57.3  | 243.9        | 77.9  | 179.69 | Yes |
| $\omega$ B97X-D/aug-cc-pVDZ   | 1995.3205 | -2.7  | 1406.4217 | -5.5  | 833.4901 | -2.8  | 268.1        | 38.1  | 290.9        | 30.9  | 179.68 | Yes |
| $\omega$ B97X-D/aug-cc-pVTZ   | 2015.7562 | 17.8  | 1418.8771 | 6.9   | 841.2891 | 5.0   | 264.4        | 41.8  | 307.6        | 14.2  | 179.99 | Yes |
| $\omega$ B97X-D/cc-pVDZ       | 1997.9542 | 0.0   | 1405.5094 | -6.5  | 833.6362 | -2.7  | 301.8        | 4.4   | 207.2        | 114.6 | 179.97 | Yes |
| $\omega$ B97X-D/cc-pVTZ       | 2016.2760 | 18.3  | 1418.3646 | 6.4   | 841.1981 | 4.9   | 265.9        | 40.3  | 283.0        | 38.8  | 179.99 | Yes |
| <b>Experiment</b>             | 1997.9755 |       | 1411.9663 |       | 836.2886 |       | 306.2        |       | 321.8        |       |        | Yes |

<sup>a</sup> Not done due to high quantum chemical cost.

**Table S-3c:** Rotational constants and the dihedral angle  $\alpha$  of *syn*-2A4MT optimized at various levels of theory. The deviations between the calculated and the experimental values of the rotational constants are given as  $\Delta A$ ,  $\Delta B$  and  $\Delta C$ .  $V_{3,1}$  is the barrier of the acetyl methyl and  $V_{3,2}$  that of the ring methyl group. All optimizations were performed under full-symmetry relaxation.

| Method/Basis Set           | $A /$<br>MHz | $\Delta A /$<br>MHz | $B /$<br>MHz | $\Delta B /$<br>MHz | $C /$<br>MHz | $\Delta C /$<br>MHz | $V_{3,1} /$<br>$\text{cm}^{-1}$ | $\Delta V_{3,1} /$<br>$\text{cm}^{-1}$ | $V_{3,2} /$<br>$\text{cm}^{-1}$ | $\Delta V_{3,2} /$<br>$\text{cm}^{-1}$ | $\alpha /$<br>$^\circ$ | Planar |
|----------------------------|--------------|---------------------|--------------|---------------------|--------------|---------------------|---------------------------------|----------------------------------------|---------------------------------|----------------------------------------|------------------------|--------|
| B3LYP-D3/6-31G(d,p)        | 2601.4782    | -43.4               | 1002.7369    | -3.5                | 730.3342     | -5.5                | 307.4                           | 17.5                                   | 214.1                           | -3.4                                   | 0.01                   | Yes    |
| B3LYP-D3/6-31+G(d,p)       | 2591.2296    | -53.7               | 1001.5151    | -4.7                | 728.8929     | -6.9                | 244.8                           | 80.1                                   | 198.2                           | 12.5                                   | 0.01                   | Yes    |
| B3LYP-D3/6-31++G(d,p)      | 2591.3320    | -53.6               | 1001.4868    | -4.7                | 728.8861     | -6.9                | 243.4                           | 81.5                                   | 200.3                           | 10.4                                   | 0.01                   | Yes    |
| B3LYP-D3/6-311G(d,p)       | 2607.2534    | -37.7               | 1005.0833    | -1.2                | 732.0281     | -3.8                | 298.1                           | 26.8                                   | 206.3                           | 4.4                                    | 0.02                   | Yes    |
| B3LYP-D3/6-311+G(d,p)      | 2599.5519    | -45.4               | 1004.9105    | -1.3                | 731.3305     | -4.5                | 255.6                           | 69.3                                   | 206.5                           | 4.2                                    | 0.02                   | Yes    |
| B3LYP-D3/6-311++G(d,p)     | 2599.4792    | -45.4               | 1004.9117    | -1.3                | 731.3251     | -4.5                | 257.1                           | 67.8                                   | 203.1                           | 7.6                                    | 0.02                   | Yes    |
| B3LYP-D3/6-311G(2d,2p)     | 2619.2060    | -25.7               | 1008.0091    | 1.8                 | 734.4795     | -1.3                | 316.0                           | 8.9                                    | 194.5                           | 16.2                                   | 0.00                   | Yes    |
| B3LYP-D3/6-311+G(2d,2p)    | 2612.8810    | -32.0               | 1008.3118    | 2.1                 | 734.1448     | -1.6                | 264.9                           | 60.0                                   | 193.0                           | 17.7                                   | 0.01                   | Yes    |
| B3LYP-D3/6-311++G(2d,2p)   | 2612.9388    | -32.0               | 1008.3026    | 2.1                 | 734.1445     | -1.6                | 267.7                           | 57.2                                   | 191.6                           | 19.1                                   | 0.01                   | Yes    |
| B3LYP-D3/6-311G(df,pd)     | 2613.8997    | -31.0               | 1008.0801    | 1.8                 | 734.1254     | -1.7                | 287.5                           | 37.4                                   | 203.0                           | 7.7                                    | 0.00                   | Yes    |
| B3LYP-D3/6-311+G(df,pd)    | 2606.6722    | -38.3               | 1008.0817    | 1.8                 | 733.5557     | -2.2                | 246.4                           | 78.5                                   | 204.7                           | 6.0                                    | 0.01                   | Yes    |
| B3LYP-D3/6-311++G(df,pd)   | 2606.6226    | -38.3               | 1008.0911    | 1.9                 | 733.5556     | -2.2                | 251.3                           | 73.6                                   | 201.7                           | 9.0                                    | 0.01                   | Yes    |
| B3LYP-D3/6-311G(2df,2pd)   | 2626.7024    | -18.2               | 1009.6178    | 3.4                 | 735.9201     | 0.1                 | 320.1                           | 4.8                                    | 189.9                           | 20.8                                   | 0.00                   | Yes    |
| B3LYP-D3/6-311+G(2df,2pd)  | 2620.3221    | -24.6               | 1009.7213    | 3.5                 | 735.4757     | -0.3                | 268.5                           | 56.4                                   | 189.6                           | 21.1                                   | 0.01                   | Yes    |
| B3LYP-D3/6-311++G(2df,2pd) | 2620.3391    | -24.6               | 1009.7076    | 3.5                 | 735.4699     | -0.3                | 271.2                           | 53.7                                   | 187.2                           | 23.5                                   | 0.01                   | Yes    |
| B3LYP-D3/6-311G(3df,3pd)   | 2631.2874    | -13.6               | 1009.9583    | 3.7                 | 736.4635     | 0.7                 | 304.5                           | 20.4                                   | 186.1                           | 24.6                                   | 0.01                   | Yes    |
| B3LYP-D3/6-311+G(3df,3pd)  | 2626.1748    | -18.8               | 1010.3115    | 4.1                 | 736.2511     | 0.5                 | 279.0                           | 45.9                                   | 187.6                           | 23.1                                   | 0.01                   | Yes    |
| B3LYP-D3/6-311++G(3df,3pd) | 2626.1571    | -18.8               | 1010.3074    | 4.1                 | 736.2472     | 0.5                 | 278.3                           | 46.6                                   | 186.5                           | 24.2                                   | 0.01                   | Yes    |
| B3LYP-D3/cc-pVDZ           | 2595.6788    | -49.2               | 1000.2675    | -6.0                | 728.6418     | -7.1                | 361.8                           | -36.9                                  | 221.2                           | -10.5                                  | 0.03                   | Yes    |
| B3LYP-D3/aug-cc-pVDZ       | 2585.1179    | -59.8               | 1000.7469    | -5.5                | 728.0478     | -7.7                | 266.7                           | 58.2                                   | 206.8                           | 3.9                                    | 0.01                   | Yes    |
| B3LYP-D3/cc-pVTZ           | 2619.1081    | -25.8               | 1009.3731    | 3.1                 | 735.1963     | -0.6                | 279.6                           | 45.3                                   | 196.6                           | 14.1                                   | 0.01                   | Yes    |
| B3LYP-D3/aug-cc-pVTZ       | 2617.2079    | -27.7               | 1009.5244    | 3.3                 | 735.1275     | -0.7                | 265.1                           | 59.8                                   | 194.5                           | 16.2                                   | 0.01                   | Yes    |
| B3LYP-D3BJ/6-31G(d,p)      | 2612.8340    | -32.1               | 1003.6541    | -2.6                | 731.7123     | -4.1                | 273.8                           | 51.1                                   | 216.0                           | -5.3                                   | 0.01                   | Yes    |

|                              |           |       |           |       |          |       |       |       |       |       |      |     |
|------------------------------|-----------|-------|-----------|-------|----------|-------|-------|-------|-------|-------|------|-----|
| B3LYP-D3BJ/6-31+G(d,p)       | 2602.3153 | -42.6 | 1002.5002 | -3.7  | 730.2883 | -5.5  | 209.8 | 115.1 | 200.2 | 10.5  | 0.01 | Yes |
| B3LYP-D3BJ/6-31++G(d,p)      | 2602.4267 | -42.5 | 1002.4709 | -3.8  | 730.2817 | -5.5  | 208.4 | 116.5 | 202.4 | 8.3   | 0.01 | Yes |
| B3LYP-D3BJ/6-311G(d,p)       | 2618.3454 | -26.6 | 1006.0078 | -0.2  | 733.3895 | -2.4  | 264.4 | 60.5  | 208.3 | 2.4   | 0.02 | Yes |
| B3LYP-D3BJ/6-311+G(d,p)      | 2610.5933 | -34.3 | 1006.0068 | -0.2  | 732.7816 | -3.0  | 219.9 | 105.0 | 208.4 | 2.3   | 0.01 | Yes |
| B3LYP-D3BJ/6-311++G(d,p)     | 2610.5255 | -34.4 | 1006.0075 | -0.2  | 732.7764 | -3.0  | 221.4 | 103.5 | 205.0 | 5.7   | 0.01 | Yes |
| B3LYP-D3BJ/6-311G(2d,2p)     | 2630.3615 | -14.6 | 1008.9671 | 2.7   | 735.8633 | 0.1   | 282.9 | 42.0  | 196.5 | 14.2  | 0.02 | Yes |
| B3LYP-D3BJ/6-311+G(2d,2p)    | 2623.9337 | -21.0 | 1009.3067 | 3.1   | 735.5415 | -0.2  | 229.5 | 95.4  | 194.9 | 15.8  | 0.00 | Yes |
| B3LYP-D3BJ/6-311++G(2d,2p)   | 2623.9948 | -20.9 | 1009.2975 | 3.1   | 735.5415 | -0.2  | 232.3 | 92.6  | 193.6 | 17.1  | 0.00 | Yes |
| B3LYP-D3BJ/6-311G(df,pd)     | 2624.7854 | -20.1 | 1009.0603 | 2.8   | 735.5007 | -0.3  | 253.0 | 71.9  | 204.9 | 5.8   | 0.00 | Yes |
| B3LYP-D3BJ/6-311+G(df,pd)    | 2617.4033 | -27.5 | 1009.1352 | 2.9   | 734.9602 | -0.8  | 210.0 | 114.9 | 206.6 | 4.1   | 0.00 | Yes |
| B3LYP-D3BJ/6-311++G(df,pd)   | 2617.3557 | -27.6 | 1009.1443 | 2.9   | 734.9601 | -0.8  | 214.9 | 110.0 | 203.6 | 7.1   | 0.00 | Yes |
| B3LYP-D3BJ/6-311G(2df,2pd)   | 2637.7344 | -7.2  | 1010.5188 | 4.3   | 737.2615 | 1.5   | 286.2 | 38.7  | 191.9 | 18.8  | 0.00 | Yes |
| B3LYP-D3BJ/6-311+G(2df,2pd)  | 2631.0756 | -13.9 | 1010.7070 | 4.5   | 736.8427 | 1.1   | 232.8 | 92.1  | 191.4 | 19.3  | 0.00 | Yes |
| B3LYP-D3BJ/6-311++G(2df,2pd) | 2631.0962 | -13.8 | 1010.6930 | 4.5   | 736.8370 | 1.0   | 235.5 | 89.4  | 189.1 | 21.6  | 0.00 | Yes |
| B3LYP-D3BJ/6-311G(3df,3pd)   | 2642.2993 | -2.6  | 1010.8504 | 4.6   | 737.7972 | 2.0   | 270.7 | 54.2  | 188.1 | 22.6  | 0.00 | Yes |
| B3LYP-D3BJ/6-311+G(3df,3pd)  | 2636.8637 | -8.1  | 1011.2921 | 5.1   | 737.6087 | 1.8   | 243.1 | 81.8  | 189.5 | 21.2  | 0.00 | Yes |
| B3LYP-D3BJ/6-311++G(3df,3pd) | 2636.8489 | -8.1  | 1011.2878 | 5.1   | 737.6050 | 1.8   | 242.4 | 82.5  | 188.4 | 22.3  | 0.00 | Yes |
| B3LYP-D3BJ/cc-pVDZ           | 2607.2897 | -37.6 | 1001.2629 | -5.0  | 730.0814 | -5.7  | 327.9 | -3.0  | 223.1 | -12.4 | 0.02 | Yes |
| B3LYP-D3BJ/aug-cc-pVDZ       | 2596.2485 | -48.7 | 1001.5802 | -4.7  | 729.3670 | -6.4  | 229.1 | 95.8  | 208.8 | 1.9   | 0.02 | Yes |
| B3LYP-D3BJ/cc-pVTZ           | 2630.0196 | -14.9 | 1010.3374 | 4.1   | 736.5644 | 0.8   | 244.4 | 80.5  | 198.5 | 12.2  | 0.00 | Yes |
| B3LYP-D3BJ/aug-cc-pVTZ       | 2628.0400 | -16.9 | 1010.5210 | 4.3   | 736.5073 | 0.7   | 229.1 | 95.8  | 196.4 | 14.3  | 0.00 | Yes |
| CAM-B3LYP-D3BJ/6-311G(d,p)   | 2645.0327 | 0.1   | 1012.3437 | 6.1   | 738.8379 | 3.0   | 289.0 | 35.9  | 220.1 | -9.4  | 0.00 | Yes |
| CAM-B3LYP-D3BJ/6-311+G(d,p)  | 2636.7089 | -8.2  | 1012.4586 | 6.2   | 738.2510 | 2.5   | 245.9 | 79.0  | 223.0 | -12.3 | 0.01 | Yes |
| CAM-B3LYP-D3BJ/6-311++G(d,p) | 2636.6305 | -8.3  | 1012.4620 | 6.2   | 738.2466 | 2.5   | 248.3 | 76.6  | 220.0 | -9.3  | 0.01 | Yes |
| CAM-B3LYP-D3BJ/cc-pVDZ       | 2634.6978 | -10.2 | 1007.3015 | 1.1   | 735.4288 | -0.4  | 343.6 | -18.7 | 237.4 | -26.7 | 0.01 | Yes |
| CAM-B3LYP-D3BJ/aug-cc-pVDZ   | 2622.2020 | -22.7 | 1007.9473 | 1.7   | 734.7802 | -1.0  | 251.8 | 73.1  | 229.9 | -19.2 | 0.01 | Yes |
| CAM-B3LYP-D3BJ/cc-pVTZ       | 2655.7364 | 10.8  | 1016.8809 | 10.6  | 742.0484 | 6.3   | 269.5 | 55.4  | 215.6 | -4.9  | 0.01 | Yes |
| CAM-B3LYP-D3BJ/aug-cc-pVTZ   | 2653.3824 | 8.5   | 1017.0339 | 10.8  | 741.9462 | 6.2   | 254.9 | 70.0  | 215.6 | -4.9  | 0.02 | Yes |
| CCSD-cc-pVDZ                 | 2589.7646 | -55.2 | 992.8722  | -13.4 | 724.3161 | -11.5 | 416.8 | -91.9 | 181.7 | 29.0  | 0.01 | Yes |
| M06-2X/6-31G(d,p)            | 2635.9870 | -8.9  | 1009.0625 | 2.8   | 736.4066 | 0.6   | 355.9 | -31.0 | 226.3 | -15.6 | 0.01 | Yes |

|                            |                  |             |                  |            |                 |             |              |              |              |             |              |            |
|----------------------------|------------------|-------------|------------------|------------|-----------------|-------------|--------------|--------------|--------------|-------------|--------------|------------|
| M06-2X/6-31+G(d,p)         | 2627.7528        | -17.2       | 1007.8931        | 1.7        | 735.1554        | -0.6        | 303.6        | 21.3         | 215.9        | -5.2        | 0.01         | Yes        |
| M06-2X/6-31++G(d,p)        | 2627.8255        | -17.1       | 1007.8828        | 1.6        | 735.1559        | -0.6        | 302.4        | 22.5         | 218.0        | -7.3        | 0.01         | Yes        |
| M06-2X/6-311G(d,p)         | 2637.7788        | -7.1        | 1011.3133        | 5.1        | 737.7395        | 1.9         | 362.7        | -37.8        | 216.9        | -6.2        | 0.02         | Yes        |
| M06-2X/6-311+G(d,p)        | 2631.4442        | -13.5       | 1011.1984        | 5.0        | 737.1835        | 1.4         | 333.8        | -8.9         | 221.6        | -10.9       | 0.00         | Yes        |
| M06-2X/6-311++G(d,p)       | 2631.3433        | -13.6       | 1011.2132        | 5.0        | 737.1836        | 1.4         | 335.3        | -10.4        | 217.8        | -7.1        | 0.00         | Yes        |
| M06-2X/6-311G(df,pd)       | 2642.4006        | -2.5        | 1013.7400        | 7.5        | 739.3770        | 3.6         | 348.6        | -23.7        | 211.7        | -1.0        | 0.01         | Yes        |
| M06-2X/6-311+G(df,pd)      | 2636.3481        | -8.6        | 1013.6732        | 7.4        | 738.8661        | 3.1         | 321.3        | 3.6          | 217.6        | -6.9        | 0.01         | Yes        |
| M06-2X/6-311++G(df,pd)     | 2636.2790        | -8.6        | 1013.6931        | 7.5        | 738.8705        | 3.1         | 327.1        | -2.2         | 214.3        | -3.6        | 0.01         | Yes        |
| M06-2X/6-311G(3df,3pd)     | 2657.3824        | 12.5        | 1015.3633        | 9.1        | 741.3826        | 5.6         | 385.4        | -60.5        | 208.7        | 2.0         | 0.02         | Yes        |
| M06-2X/6-311+G(3df,3pd)    | 2653.2325        | 8.3         | 1015.7277        | 9.5        | 741.2544        | 5.5         | 367.6        | -42.7        | 210.6        | 0.1         | 0.02         | Yes        |
| M06-2X/6-311++G(3df,3pd)   | 2653.2271        | 8.3         | 1015.7186        | 9.5        | 741.2488        | 5.5         | 367.2        | -42.3        | 209.7        | 1.0         | 0.02         | Yes        |
| M06-2X/cc-pVDZ             | 2632.8818        | -12.0       | 1007.0152        | 0.8        | 735.1449        | -0.6        | 386.6        | -61.7        | 231.0        | -20.3       | 0.01         | Yes        |
| M06-2X/aug-cc-pVDZ         | 2621.4279        | -23.5       | 1007.5902        | 1.4        | 734.5411        | -1.2        | 325.5        | -0.6         | 232.2        | -21.5       | 0.00         | Yes        |
| M06-2X/cc-pVTZ             | 2647.5473        | 2.6         | 1015.6045        | 9.4        | 740.7453        | 5.0         | 348.4        | -23.5        | 213.6        | -2.9        | 0.01         | Yes        |
| M06-2X/aug-cc-pVTZ         | 2646.0467        | 1.1         | 1015.7707        | 9.5        | 740.7156        | 4.9         | 341.2        | -16.3        | 215.3        | -4.6        | 0.02         | Yes        |
| <b>MP2/6-31G(d,p)</b>      | <b>2638.4658</b> | <b>-6.5</b> | <b>1006.2736</b> | <b>0.0</b> | <b>735.0768</b> | <b>-0.7</b> | <b>370.2</b> | <b>-45.3</b> | <b>184.2</b> | <b>26.5</b> | <b>0.00</b>  | <b>Yes</b> |
| MP2/6-31+G(d,p)            | 2627.0088        | -17.9       | 1004.5288        | -1.7       | 733.2786        | -2.5        | 285.2        | 39.7         | 176.2        | 34.5        | 0.01         | Yes        |
| MP2/6-31++G(d,p)           | 2626.8646        | -18.1       | 1004.4746        | -1.8       | 733.2406        | -2.6        |              |              | 182.3        | 28.4        | -0.06        | Yes        |
| MP2/6-311G(d,p)            | 2635.1569        | -9.8        | 1004.6614        | -1.6       | 734.0230        | -1.8        | 352.6        | -27.7        | 164.8        | 45.9        | 0.04         | Yes        |
| MP2/6-311+G(d,p)           | 2625.8529        | -19.1       | 1004.4667        | -1.8       | 733.2009        | -2.6        | 311.4        | 13.5         | 172.3        | 38.4        | 0.00         | Yes        |
| MP2/6-311++G(d,p)          | 2625.8529        | -19.1       | 1004.4667        | -1.8       | 733.2009        | -2.6        | 314.3        | 10.6         | 165.7        | 45.0        | 0.00         | Yes        |
| MP2/6-311G(2d,2p)          | 2635.6490        | -9.3        | 1009.4822        | 3.2        | 736.5367        | 0.7         | 355.2        | -30.3        | 156.4        | 54.3        | 0.02         | Yes        |
| MP2/6-311+G(2d,2p)         | 2628.5531        | -16.4       | 1009.7794        | 3.5        | 736.1437        | 0.4         | 303.7        | 21.2         | 153.6        | 57.1        | 0.01         | Yes        |
| MP2/6-311++G(2d,2p)        | 2628.6870        | -16.2       | 1009.7233        | 3.5        | 736.1260        | 0.3         | 307.2        | 17.7         | 151.7        | 59.0        | 0.01         | Yes        |
| MP2/6-311G(df,pd)          | 2654.3153        | 9.4         | 1010.4405        | 4.2        | 738.5643        | 2.8         | 334.9        | -10.0        | 161.8        | 48.9        | 0.00         | Yes        |
| <b>MP2/6-311+G(df,pd)</b>  | <b>2644.8388</b> | <b>-0.1</b> | <b>1009.9215</b> | <b>3.7</b> | <b>737.5579</b> | <b>1.8</b>  | <b>286.0</b> | <b>38.9</b>  | <b>167.1</b> | <b>43.6</b> | <b>-0.03</b> | <b>Yes</b> |
| <b>MP2/6-311++G(df,pd)</b> | <b>2644.5603</b> | <b>-0.4</b> | <b>1009.8853</b> | <b>3.7</b> | <b>737.5160</b> | <b>1.7</b>  |              |              | <b>162.5</b> | <b>48.2</b> | <b>-0.12</b> | <b>Yes</b> |
| MP2/6-311G(2df,2pd)        | 2660.6414        | 15.7        | 1013.3557        | 7.1        | 740.5544        | 4.8         | 350.8        | -25.9        | 143.5        | 67.2        | 0.01         | Yes        |
| MP2/6-311+G(2df,2pd)       | 2652.4601        | 7.5         | 1013.2104        | 7.0        | 739.8459        | 4.1         | 295.4        | 29.5         | 144.4        | 66.3        | 0.01         | Yes        |
| MP2/6-311++G(2df,2pd)      | 2652.3683        | 7.4         | 1013.2005        | 7.0        | 739.8344        | 4.0         | 301.0        | 23.9         | 141.2        | 69.5        | 0.02         | Yes        |

|                               |           |       |           |       |          |       |       |       |       |       |      |     |
|-------------------------------|-----------|-------|-----------|-------|----------|-------|-------|-------|-------|-------|------|-----|
| MP2/6-311G(3df,3pd)           | 2666.0479 | 21.1  | 1011.9974 | 5.8   | 740.2604 | 4.5   | 353.9 | -29.0 | 137.5 | 73.2  | 0.01 | Yes |
| MP2/6-311+G(3df,3pd)          | 2659.9035 | 15.0  | 1012.1462 | 5.9   | 739.8668 | 4.1   | 311.3 | 13.6  | 141.1 | 69.6  | 0.01 | Yes |
| MP2/6-311++G(3df,3pd)         | 2659.9087 | 15.0  | 1012.1573 | 5.9   | 739.8733 | 4.1   | 311.0 | 13.9  | 140.6 | 70.1  | 0.01 | Yes |
| MP2/cc-pVDZ                   | 2613.4345 | -31.5 | 995.3465  | -10.9 | 727.4509 | -8.3  | 418.0 | -93.1 | 184.3 | 26.4  | 0.00 | Yes |
| MP2/aug-cc-pVDZ               | 2597.4151 | -47.5 | 994.5343  | -11.7 | 725.7778 | -10.0 | 290.1 | 34.8  | 166.0 | 44.7  | 0.00 | Yes |
| MP2/cc-pVTZ                   | 2650.9636 | 6.0   | 1011.1248 | 4.9   | 738.6209 | 2.8   | 308.6 | 16.3  | 153.5 | 57.2  | 0.00 | Yes |
| MP2/aug-cc-pVTZ               | 2648.3007 | 3.4   | 1011.2585 | 5.0   | 738.4997 | 2.7   |       |       |       |       | 0.01 | Yes |
| $\omega$ B97X-D/6-311G(d,p)   | 2629.8921 | -15.0 | 1010.8145 | 4.6   | 736.8607 | 1.1   | 290.7 | 34.2  | 210.2 | 0.5   | 0.00 | Yes |
| $\omega$ B97X-D/6-311+G(d,p)  | 2629.7781 | -15.2 | 1010.8188 | 4.6   | 736.8538 | 1.1   | 293.9 | 31.0  | 206.8 | 3.9   | 0.00 | Yes |
| $\omega$ B97X-D/6-311++G(d,p) | 2636.7931 | -8.1  | 1010.8193 | 4.6   | 737.4018 | 1.6   | 320.4 | 4.5   | 206.1 | 4.6   | 0.00 | Yes |
| $\omega$ B97X-D/aug-cc-pVDZ   | 2616.6259 | -28.3 | 1005.9957 | -0.2  | 733.3220 | -2.5  | 310.2 | 14.7  | 221.8 | -11.1 | 0.01 | Yes |
| $\omega$ B97X-D/aug-cc-pVTZ   | 2646.6516 | 1.7   | 1015.1397 | 8.9   | 740.4266 | 4.6   | 308.3 | 16.6  | 202.9 | 7.8   | 0.01 | Yes |
| $\omega$ B97X-D/cc-pVDZ       | 2628.3348 | -16.6 | 1005.1752 | -1.1  | 733.8127 | -2.0  | 358.4 | -33.5 | 222.0 | -11.3 | 0.02 | Yes |
| $\omega$ B97X-D/cc-pVTZ       | 2648.4300 | 3.5   | 1014.8613 | 8.6   | 740.4173 | 4.6   | 312.4 | 12.5  | 202.0 | 8.7   | 0.01 | Yes |
| <b>Experiment</b>             | 2644.9282 |       | 1006.2336 |       | 735.7908 |       | 324.9 |       | 210.7 |       |      |     |

**Table S-3d:** Rotational constants of *anti*-2A4MT optimized at various levels of theory. The deviations between the calculated and the experimental values of the rotational constants are given as  $\Delta A$ ,  $\Delta B$  and  $\Delta C$ .  $V_{3,1}$  is the barrier of the acetyl methyl and  $V_{3,2}$  that of the ring methyl group. All optimizations were performed under full-symmetry relaxation.

| Method/Basis Set           | $A /$<br>MHz | $\Delta A /$<br>MHz | $B /$<br>MHz | $\Delta B /$<br>MHz | $C /$<br>MHz | $\Delta C /$<br>MHz | $V_{3,1} /$<br>$\text{cm}^{-1}$ | $\Delta V_{3,1} /$<br>$\text{cm}^{-1}$ | $V_{3,2} /$<br>$\text{cm}^{-1}$ | $\Delta V_{3,2} /$<br>$\text{cm}^{-1}$ | $\alpha /$<br>$^\circ$ | Planar |
|----------------------------|--------------|---------------------|--------------|---------------------|--------------|---------------------|---------------------------------|----------------------------------------|---------------------------------|----------------------------------------|------------------------|--------|
| B3LYP-D3/6-31G(d,p)        | 2673.5389    | -57.0               | 988.7175     | -2.7                | 728.3155     | -6.0                | 293.4                           | -12.2                                  | 234.3                           | -21.3                                  | 179.98                 | Yes    |
| B3LYP-D3/6-31+G(d,p)       | 2677.1494    | -53.4               | 986.1828     | -5.3                | 727.2193     | -7.1                | 221.0                           | 60.2                                   | 215.6                           | -2.6                                   | -179.97                | Yes    |
| B3LYP-D3/6-31++G(d,p)      | 2677.3617    | -53.2               | 986.1525     | -5.3                | 727.2187     | -7.1                | 215.3                           | 65.9                                   | 216.4                           | -3.4                                   | -179.99                | Yes    |
| B3LYP-D3/6-311G(d,p)       | 2682.3126    | -48.3               | 990.6725     | -0.8                | 730.0208     | -4.3                | 251.3                           | 29.9                                   | 224.3                           | -11.3                                  | -179.99                | Yes    |
| B3LYP-D3/6-311+G(d,p)      | 2686.9337    | -43.6               | 989.4651     | -2.0                | 729.7072     | -4.6                | 220.2                           | 61.0                                   | 220.6                           | -7.6                                   | -179.99                | Yes    |
| B3LYP-D3/6-311++G(d,p)     | 2686.9523    | -43.6               | 989.4849     | -2.0                | 729.7195     | -4.6                | 223.6                           | 57.6                                   | 216.2                           | -3.2                                   | 180.01                 | Yes    |
| B3LYP-D3/6-311G(2d,2p)     | 2698.0544    | -32.5               | 993.1695     | 1.7                 | 732.5025     | -1.8                | 276.4                           | 4.8                                    | 200.9                           | 12.1                                   | -179.99                | Yes    |
| B3LYP-D3/6-311+G(2d,2p)    | 2702.5715    | -28.0               | 992.4287     | 1.0                 | 732.4325     | -1.8                | 234.5                           | 46.7                                   | 200.4                           | 12.6                                   | 180.01                 | Yes    |
| B3LYP-D3/6-311++G(2d,2p)   | 2702.6846    | -27.9               | 992.4343     | 1.0                 | 732.4441     | -1.8                | 239.2                           | 42.0                                   | 198.6                           | 14.4                                   | 180.01                 | Yes    |
| B3LYP-D3/6-311G(df,pd)     | 2690.6927    | -39.9               | 993.7649     | 2.3                 | 732.3055     | -2.0                | 239.7                           | 41.5                                   | 220.5                           | -7.5                                   | -179.96                | Yes    |
| B3LYP-D3/6-311+G(df,pd)    | 2695.4562    | -35.1               | 992.5417     | 1.1                 | 731.9909     | -2.3                | 207.9                           | 73.3                                   | 219.3                           | -6.3                                   | -179.99                | Yes    |
| B3LYP-D3/6-311++G(df,pd)   | 2695.4669    | -35.1               | 992.5676     | 1.1                 | 732.0049     | -2.3                | 213.4                           | 67.8                                   | 214.8                           | -1.8                                   | 180.00                 | Yes    |
| B3LYP-D3/6-311G(2df,2pd)   | 2706.7202    | -23.9               | 994.8561     | 3.4                 | 734.0552     | -0.2                | 271.4                           | 9.8                                    | 196.8                           | 16.2                                   | 180.01                 | Yes    |
| B3LYP-D3/6-311+G(2df,2pd)  | 2711.6058    | -19.0               | 993.8990     | 2.4                 | 733.8926     | -0.4                | 234.5                           | 46.7                                   | 196.7                           | 16.3                                   | 180.01                 | Yes    |
| B3LYP-D3/6-311++G(2df,2pd) | 2711.6608    | -18.9               | 993.8964     | 2.4                 | 733.8956     | -0.4                | 238.6                           | 42.6                                   | 194.1                           | 18.9                                   | 180.01                 | Yes    |
| B3LYP-D3/6-311G(3df,3pd)   | 2715.7476    | -14.8               | 995.1724     | 3.7                 | 734.8911     | 0.6                 | 254.6                           | 26.6                                   | 188.5                           | 24.5                                   | -179.98                | Yes    |
| B3LYP-D3/6-311+G(3df,3pd)  | 2718.0482    | -12.5               | 994.6161     | 3.2                 | 734.7565     | 0.5                 | 240.9                           | 40.3                                   | 193.7                           | 19.3                                   | 180.01                 | Yes    |
| B3LYP-D3/6-311++G(3df,3pd) | 2718.0005    | -12.6               | 994.5847     | 3.1                 | 734.7356     | 0.5                 | 239.8                           | 41.4                                   | 192.5                           | 20.5                                   | 180.00                 | Yes    |
| B3LYP-D3/cc-pVDZ           | 2664.4117    | -66.2               | 986.8474     | -4.6                | 726.6988     | -7.6                | 323.5                           | -42.3                                  | 237.8                           | -24.8                                  | 179.99                 | Yes    |
| B3LYP-D3/aug-cc-pVDZ       | 2674.4695    | -56.1               | 984.9770     | -6.5                | 726.4110     | -7.9                | 236.1                           | 45.1                                   | 209.5                           | 3.5                                    | 180.01                 | Yes    |
| B3LYP-D3/cc-pVTZ           | 2705.5037    | -25.1               | 994.1679     | 2.7                 | 733.5924     | -0.7                | 252.8                           | 28.4                                   | 205.5                           | 7.5                                    | -179.97                | Yes    |
| B3LYP-D3/aug-cc-pVTZ       | 2707.5402    | -23.0               | 993.9172     | 2.5                 | 733.6058     | -0.7                | 237.3                           | 43.9                                   | 200.6                           | 12.4                                   | 180.01                 | Yes    |
| B3LYP-D3BJ/6-31G(d,p)      | 2683.6800    | -46.9               | 989.8207     | -1.6                | 729.6631     | -4.6                | 257.1                           | 24.1                                   | 235.8                           | -22.8                                  | 179.99                 | Yes    |

|                                     |                  |             |                 |            |                 |            |              |             |              |             |                |            |
|-------------------------------------|------------------|-------------|-----------------|------------|-----------------|------------|--------------|-------------|--------------|-------------|----------------|------------|
| B3LYP-D3BJ/6-31+G(d,p)              | 2687.9700        | -42.6       | 987.2505        | -4.2       | 728.5947        | -5.7       | 182.9        | 98.3        | 217.1        | -4.1        | -179.96        | Yes        |
| B3LYP-D3BJ/6-31++G(d,p)             | 2688.1636        | -42.4       | 987.1791        | -4.3       | 728.5702        | -5.7       | 176.9        | 104.3       | 217.9        | -4.9        | 180.02         | Yes        |
| B3LYP-D3BJ/6-311G(d,p)              | 2692.7856        | -37.8       | 991.7359        | 0.3        | 731.3705        | -2.9       | 211.0        | 70.2        | 226.0        | -13.0       | 180.01         | Yes        |
| B3LYP-D3BJ/6-311+G(d,p)             | 2697.7977        | -32.8       | 990.5326        | -0.9       | 731.0855        | -3.2       | 178.8        | 102.4       | 222.0        | -9.0        | 179.99         | Yes        |
| B3LYP-D3BJ/6-311++G(d,p)            | 2697.8456        | -32.7       | 990.5528        | -0.9       | 731.1000        | -3.2       | 182.3        | 98.9        | 217.7        | -4.7        | 179.99         | Yes        |
| B3LYP-D3BJ/6-311G(2d,2p)            | 2708.6540        | -21.9       | 994.2569        | 2.8        | 733.8718        | -0.4       | 235.3        | 45.9        | 202.3        | 10.7        | 180.03         | Yes        |
| B3LYP-D3BJ/6-311+G(2d,2p)           | 2713.5010        | -17.1       | 993.4740        | 2.0        | 733.8009        | -0.5       | 191.8        | 89.4        | 201.7        | 11.3        | -179.98        | Yes        |
| B3LYP-D3BJ/6-311++G(2d,2p)          | 2713.5976        | -17.0       | 993.4957        | 2.0        | 733.8201        | -0.5       | 196.7        | 84.5        | 199.9        | 13.1        | -179.98        | Yes        |
| B3LYP-D3BJ/6-311G(df,pd)            | 2701.0908        | -29.5       | 994.8229        | 3.4        | 733.6465        | -0.6       | 197.9        | 83.3        | 222.2        | -9.2        | 180.00         | Yes        |
| B3LYP-D3BJ/6-311+G(df,pd)           | 2706.2617        | -24.3       | 993.6018        | 2.1        | 733.3608        | -0.9       | 165.2        | 116.0       | 220.8        | -7.8        | 179.96         | Yes        |
| B3LYP-D3BJ/6-311++G(df,pd)          | 2706.3329        | -24.2       | 993.6205        | 2.2        | 733.3752        | -0.9       | 170.6        | 110.6       | 216.2        | -3.2        | 179.99         | Yes        |
| B3LYP-D3BJ/6-311G(2df,2pd)          | 2717.2634        | -13.3       | 995.9366        | 4.5        | 735.4154        | 1.1        | 229.6        | 51.6        | 198.3        | 14.7        | 180.03         | Yes        |
| B3LYP-D3BJ/6-311+G(2df,2pd)         | 2722.4213        | -8.2        | 994.9458        | 3.5        | 735.2518        | 1.0        | 191.5        | 89.7        | 197.9        | 15.1        | -179.99        | Yes        |
| B3LYP-D3BJ/6-311++G(2df,2pd)        | 2722.4917        | -8.1        | 994.9462        | 3.5        | 735.2575        | 1.0        | 195.6        | 85.6        | 195.4        | 17.6        | -179.99        | Yes        |
| B3LYP-D3BJ/6-311G(3df,3pd)          | 2726.3224        | -4.3        | 996.2316        | 4.8        | 736.2396        | 2.0        | 212.7        | 68.5        | 190.0        | 23.0        | -179.97        | Yes        |
| <b>B3LYP-D3BJ/6-311+G(3df,3pd)</b>  | <b>2728.8828</b> | <b>-1.7</b> | <b>995.6649</b> | <b>4.2</b> | <b>736.1168</b> | <b>1.8</b> | <b>197.1</b> | <b>84.1</b> | <b>195.0</b> | <b>18.0</b> | <b>-179.99</b> | <b>Yes</b> |
| <b>B3LYP-D3BJ/6-311++G(3df,3pd)</b> | <b>2728.8540</b> | <b>-1.7</b> | <b>995.6462</b> | <b>4.2</b> | <b>736.1042</b> | <b>1.8</b> | <b>196.0</b> | <b>85.2</b> | <b>193.9</b> | <b>19.1</b> | <b>-179.99</b> | <b>Yes</b> |
| B3LYP-D3BJ/cc-pVDZ                  | 2675.1523        | -55.4       | 987.9894        | -3.5       | 728.1135        | -6.2       | 285.3        | -4.1        | 239.2        | -26.2       | 179.99         | Yes        |
| B3LYP-D3BJ/aug-cc-pVDZ              | 2685.6086        | -45.0       | 986.1277        | -5.3       | 727.8551        | -6.4       | 195.6        | 85.6        | 210.9        | 2.1         | -179.97        | Yes        |
| B3LYP-D3BJ/cc-pVTZ                  | 2716.2177        | -14.4       | 995.2439        | 3.8        | 734.9621        | 0.7        | 210.5        | 70.7        | 206.8        | 6.2         | -179.97        | Yes        |
| B3LYP-D3BJ/aug-cc-pVTZ              | 2718.4714        | -12.1       | 994.9671        | 3.5        | 734.9763        | 0.7        | 194.7        | 86.5        | 201.9        | 11.1        | -179.99        | Yes        |
| CAM-B3LYP-D3BJ/6-311G(d,p)          | 2716.7748        | -13.8       | 998.6185        | 7.2        | 736.8736        | 2.6        | 230.6        | 50.6        | 240.0        | -27.0       | 180.00         | Yes        |
| CAM-B3LYP-D3BJ/6-311+G(d,p)         | 2722.1944        | -8.4        | 997.3387        | 5.9        | 736.5744        | 2.3        | 199.7        | 81.5        | 239.9        | -26.9       | 179.98         | Yes        |
| CAM-B3LYP-D3BJ/6-311++G(d,p)        | 2722.2625        | -8.3        | 997.3623        | 5.9        | 736.5923        | 2.3        | 204.3        | 76.9        | 235.3        | -22.3       | 180.00         | Yes        |
| CAM-B3LYP-D3BJ/cc-pVDZ              | 2698.9992        | -31.6       | 994.6806        | 3.2        | 733.5039        | -0.8       | 299.3        | -18.1       | 256.7        | -43.7       | 180.02         | Yes        |
| CAM-B3LYP-D3BJ/aug-cc-pVDZ          | 2709.9589        | -20.6       | 992.7073        | 1.3        | 733.2164        | -1.1       | 213.6        | 67.6        | 234.4        | -21.4       | -179.98        | Yes        |
| CAM-B3LYP-D3BJ/cc-pVTZ              | 2740.8239        | 10.2        | 1002.0625       | 10.6       | 740.4722        | 6.2        | 231.5        | 49.7        | 226.6        | -13.6       | -179.97        | Yes        |
| CAM-B3LYP-D3BJ/aug-cc-pVTZ          | 2743.2407        | 12.7        | 1001.7193       | 10.3       | 740.4609        | 6.2        | 215.6        | 65.6        | 224.1        | -11.1       | -179.98        | Yes        |
| CCSD-cc-pVDZ                        | 2659.9505        | -70.6       | 979.3844        | -12.1      | 722.3826        | -11.9      | 366.6        | -85.4       | 193.0        | 20.0        | -179.95        | Yes        |
| M06-2X/6-31G(d,p)                   | 2713.0282        | -17.6       | 995.0118        | 3.6        | 734.6556        | 0.4        | 320.2        | -39.0       | 247.0        | -34.0       | -180.00        | Yes        |

|                            |                  |            |                 |            |                 |            |              |             |              |             |               |           |
|----------------------------|------------------|------------|-----------------|------------|-----------------|------------|--------------|-------------|--------------|-------------|---------------|-----------|
| M06-2X/6-31+G(d,p)         | 2716.6462        | -13.9      | 992.6814        | 1.2        | 733.6610        | -0.6       | 256.7        | 24.5        | 233.7        | -20.7       | 180.01        | Yes       |
| M06-2X/6-31++G(d,p)        | 2716.7567        | -13.8      | 992.6909        | 1.2        | 733.6747        | -0.6       | 250.9        | 30.3        | 233.7        | -20.7       | 180.00        | Yes       |
| M06-2X/6-311G(d,p)         | 2720.5492        | -10.0      | 996.5336        | 5.1        | 736.0299        | 1.8        | 292.3        | -11.1       | 235.2        | -22.2       | -179.98       | Yes       |
| M06-2X/6-311+G(d,p)        | 2725.3481        | -5.2       | 995.3236        | 3.9        | 735.7194        | 1.4        | 274.4        | 6.8         | 236.2        | -23.2       | -179.98       | Yes       |
| M06-2X/6-311++G(d,p)       | 2725.4583        | -5.1       | 995.3539        | 3.9        | 735.7445        | 1.5        | 279.0        | 2.2         | 231.0        | -18.0       | -179.98       | Yes       |
| M06-2X/6-311G(df,pd)       | 2727.5835        | -3.0       | 998.9027        | 7.5        | 737.8219        | 3.5        | 276.6        | 4.6         | 229.6        | -16.6       | -179.96       | Yes       |
| M06-2X/6-311+G(df,pd)      | 2732.3101        | 1.7        | 997.7455        | 6.3        | 737.5321        | 3.3        | 259.1        | 22.1        | 232.6        | -19.6       | 180.00        | Yes       |
| M06-2X/6-311++G(df,pd)     | 2732.4539        | 1.9        | 997.7724        | 6.3        | 737.5570        | 3.3        | 266.1        | 15.1        | 227.4        | -14.4       | 180.00        | Yes       |
| M06-2X/6-311G(3df,3pd)     | 2751.5364        | 21.0       | 999.9629        | 8.5        | 740.1171        | 5.8        | 320.9        | -39.7       | 211.3        | 1.7         | 180.01        | Yes       |
| M06-2X/6-311+G(3df,3pd)    | 2753.6205        | 23.0       | 999.5225        | 8.1        | 740.0272        | 5.8        | 314.2        | -33.0       | 216.3        | -3.3        | -179.98       | Yes       |
| M06-2X/6-311++G(3df,3pd)   | 2753.5907        | 23.0       | 999.5047        | 8.1        | 740.0150        | 5.7        | 313.0        | -31.8       | 215.3        | -2.3        | -179.98       | Yes       |
| M06-2X/cc-pVDZ             | 2706.2011        | -24.4      | 993.5869        | 2.1        | 733.4492        | -0.8       | 340.9        | -59.7       | 248.6        | -35.6       | -179.99       | Yes       |
| M06-2X/aug-cc-pVDZ         | 2716.0771        | -14.5      | 991.6555        | 0.2        | 733.1005        | -1.2       | 286.3        | -5.1        | 233.5        | -20.5       | -179.99       | Yes       |
| M06-2X/cc-pVTZ             | 2742.9568        | 12.4       | 999.7467        | 8.3        | 739.3785        | 5.1        | 305.5        | -24.3       | 222.6        | -9.6        | 180.01        | Yes       |
| M06-2X/aug-cc-pVTZ         | 2745.6248        | 15.0       | 999.4736        | 8.0        | 739.4220        | 5.1        | 297.2        | -16.0       | 221.4        | -8.4        | -179.97       | Yes       |
| MP2/6-31G(d,p)             | 2703.1755        | -27.4      | 993.2393        | 1.8        | 732.9337        | -1.3       | 341.4        | -60.2       | 197.7        | 15.3        | 180.01        | Yes       |
| MP2/6-31+G(d,p)            | 2706.1712        | -24.4      | 989.2247        | -2.2       | 731.8120        | -2.5       | 253.9        | 27.3        | 188.2        | 24.8        | 175.23        | No        |
| MP2/6-31++G(d,p)           | 2703.0127        | -27.6      | 989.3621        | -2.1       | 732.3712        | -1.9       | 252.6        | 28.6        | 191.0        | 22.0        | 174.93        | No        |
| MP2/6-311G(d,p)            | 2711.9214        | -18.7      | 990.3318        | -1.1       | 732.0507        | -2.2       | 295.8        | -14.6       | 177.3        | 35.7        | 180.00        | Yes       |
| MP2/6-311+G(d,p)           | 2714.3525        | -16.2      | 988.2229        | -3.2       | 732.2135        | -2.1       | 269.9        | 11.3        | 176.8        | 36.2        | 175.10        | No        |
| MP2/6-311++G(d,p)          | 2712.0149        | -18.6      | 988.1640        | -3.3       | 732.7234        | -1.6       | 266.4        | 14.8        | 172.3        | 40.7        | 174.08        | No        |
| MP2/6-311G(2d,2p)          | 2717.9579        | -12.6      | 994.3983        | 2.9        | 734.6183        | 0.3        | 290.0        | -8.8        | 159.1        | 53.9        | -179.98       | Yes       |
| MP2/6-311+G(2d,2p)         | 2722.9976        | -7.6       | 993.4229        | 2.0        | 734.4538        | 0.2        | 256.5        | 24.7        | 156.2        | 56.8        | 180.01        | Yes       |
| MP2/6-311++G(2d,2p)        | 2723.4295        | -7.2       | 993.3735        | 1.9        | 734.4604        | 0.2        | 257.9        | 23.3        | 155.4        | 57.6        | 180.01        | Yes       |
| MP2/6-311G(df,pd)          | 2734.1347        | 3.6        | 996.3579        | 4.9        | 736.9312        | 2.7        | 264.6        | 16.6        | 173.3        | 39.7        | -179.98       | Yes       |
| <b>MP2/6-311+G(df,pd)</b>  | <b>2732.7276</b> | <b>2.1</b> | <b>993.8389</b> | <b>2.4</b> | <b>737.4365</b> | <b>3.2</b> | <b>253.2</b> | <b>28.0</b> | <b>173.7</b> | <b>39.3</b> | <b>173.67</b> | <b>No</b> |
| <b>MP2/6-311++G(df,pd)</b> | <b>2730.7259</b> | <b>0.1</b> | <b>993.8610</b> | <b>2.4</b> | <b>737.8011</b> | <b>3.5</b> | <b>254.3</b> | <b>26.9</b> | <b>170.1</b> | <b>42.9</b> | <b>173.28</b> | <b>No</b> |
| MP2/6-311G(2df,2pd)        | 2742.1858        | 11.6       | 998.8556        | 7.4        | 738.8272        | 4.6        | 280.6        | 0.6         | 148.0        | 65.0        | -179.99       | Yes       |
| MP2/6-311+G(2df,2pd)       | 2747.4517        | 16.9       | 997.3091        | 5.9        | 738.3627        | 4.1        | 246.9        | 34.3        | 147.9        | 65.1        | 180.00        | Yes       |
| MP2/6-311++G(2df,2pd)      | 2747.5992        | 17.0       | 997.3011        | 5.8        | 738.3705        | 4.1        | 249.4        | 31.8        | 145.9        | 67.1        | 180.01        | Yes       |



|                               |           |       |          |       |          |       |       |       |       |       |         |     |
|-------------------------------|-----------|-------|----------|-------|----------|-------|-------|-------|-------|-------|---------|-----|
| MP2/6-311G(3df,3pd)           | 2752.9610 | 22.4  | 997.3915 | 5.9   | 738.8151 | 4.5   | 274.8 | 6.4   | 138.5 | 74.5  | -179.99 | Yes |
| MP2/6-311+G(3df,3pd)          | 2755.1990 | 24.6  | 996.4282 | 5.0   | 738.4483 | 4.2   | 247.7 | 33.5  | 144.5 | 68.5  | 180.02  | Yes |
| MP2/6-311++G(3df,3pd)         | 2755.2768 | 24.7  | 996.3739 | 4.9   | 738.4242 | 4.1   | 243.8 | 37.4  | 142.6 | 70.4  | 180.02  | Yes |
| MP2/cc-pVDZ                   | 2678.4668 | -52.1 | 982.6398 | -8.8  | 725.4915 | -8.8  | 260.1 | 21.1  | 159.1 | 53.9  | 180.01  | Yes |
| MP2/aug-cc-pVDZ               | 2690.2845 | -40.3 | 978.5267 | -12.9 | 724.1102 | -10.2 | 248.6 | 32.6  | 163.0 | 50.0  | 180.00  | Yes |
| MP2/cc-pVTZ                   | 2738.3196 | 7.7   | 996.0755 | 4.6   | 737.0309 | 2.8   |       |       |       |       | -179.99 | Yes |
| MP2/aug-cc-pVTZ               | 2740.5904 | 10.0  | 995.6018 | 4.1   | 736.9496 | 2.7   | 366.4 | -85.2 | 193.7 | 19.3  | 180.02  | Yes |
| $\omega$ B97X-D/6-311G(d,p)   | 2719.1353 | -11.4 | 994.6788 | 3.2   | 734.9196 | 0.6   | 221.5 | 59.7  | 226.6 | -13.6 | 180.00  | Yes |
| $\omega$ B97X-D/6-311+G(d,p)  | 2719.1954 | -11.4 | 994.6938 | 3.2   | 734.9322 | 0.7   | 226.4 | 54.8  | 221.8 | -8.8  | 179.99  | Yes |
| $\omega$ B97X-D/6-311++G(d,p) | 2714.7557 | -15.8 | 995.7710 | 4.3   | 735.1950 | 0.9   | 244.8 | 36.4  | 225.5 | -12.5 | -179.99 | Yes |
| $\omega$ B97X-D/aug-cc-pVDZ   | 2707.7899 | -22.8 | 989.9923 | -1.5  | 731.5950 | -2.7  | 250.8 | 30.4  | 226.2 | -13.2 | -179.99 | Yes |
| $\omega$ B97X-D/aug-cc-pVTZ   | 2741.1694 | 10.6  | 998.7434 | 7.3   | 738.7002 | 4.4   | 249.5 | 31.7  | 210.2 | 2.8   | -179.97 | Yes |
| $\omega$ B97X-D/cc-pVDZ       | 2697.0119 | -33.6 | 991.5958 | 0.1   | 731.6937 | -2.6  | 300.3 | -19.1 | 240.2 | -27.2 | 180.00  | Yes |
| $\omega$ B97X-D/cc-pVTZ       | 2738.9395 | 8.4   | 998.8403 | 7.4   | 738.5911 | 4.3   | 253.9 | 27.3  | 211.6 | 1.4   | -179.97 | Yes |
| <b>Experiment</b>             | 2730.5803 |       | 991.4523 |       | 734.2752 |       | 281.2 |       | 213.0 |       |         |     |

**Table S-4:** Coefficients of the one-dimensional Fourier expansion for the potential energy curves of *syn*- and *anti*-2A5MT given in Figure 3 and Figure S-1 calculated at the MP2/6-31G(d,p), level of theory. The potential is expanded as  $V(\varphi) = \sum_{i=0}^2 a_i f_i$ .

| <i>i</i> | <i>f<sub>i</sub></i> | <i>syn</i>                     |                                         |                                |                                         | <i>anti</i>                    |                                         |                                |                                         |
|----------|----------------------|--------------------------------|-----------------------------------------|--------------------------------|-----------------------------------------|--------------------------------|-----------------------------------------|--------------------------------|-----------------------------------------|
|          |                      | Acetyl Methyl                  |                                         | Ring Methyl                    |                                         | Acetyl Methyl                  |                                         | Ring Methyl                    |                                         |
|          |                      | <i>a<sub>i</sub></i> / Hartree | <i>a<sub>i</sub></i> / cm <sup>-1</sup> | <i>a<sub>i</sub></i> / Hartree | <i>a<sub>i</sub></i> / cm <sup>-1</sup> | <i>a<sub>i</sub></i> / Hartree | <i>a<sub>i</sub></i> / cm <sup>-1</sup> | <i>a<sub>i</sub></i> / Hartree | <i>a<sub>i</sub></i> / cm <sup>-1</sup> |
| 0        | 1                    | -743.3675393                   |                                         | -743.3679628                   |                                         | -743.3654078                   |                                         | -743.3658014                   |                                         |
| 1        | cos 3α               | -0.0008114                     | -178.1                                  | 0.0003787                      | 83.1                                    | 0.0007944                      | 174.3                                   | 0.0004014                      | 88.1                                    |
| 2        | cos 6α               | -0.0000496                     | -10.9                                   | 0.0000325                      | 7.1                                     | 0.0000360                      | 7.9                                     | 0.0000329                      | 7.2                                     |

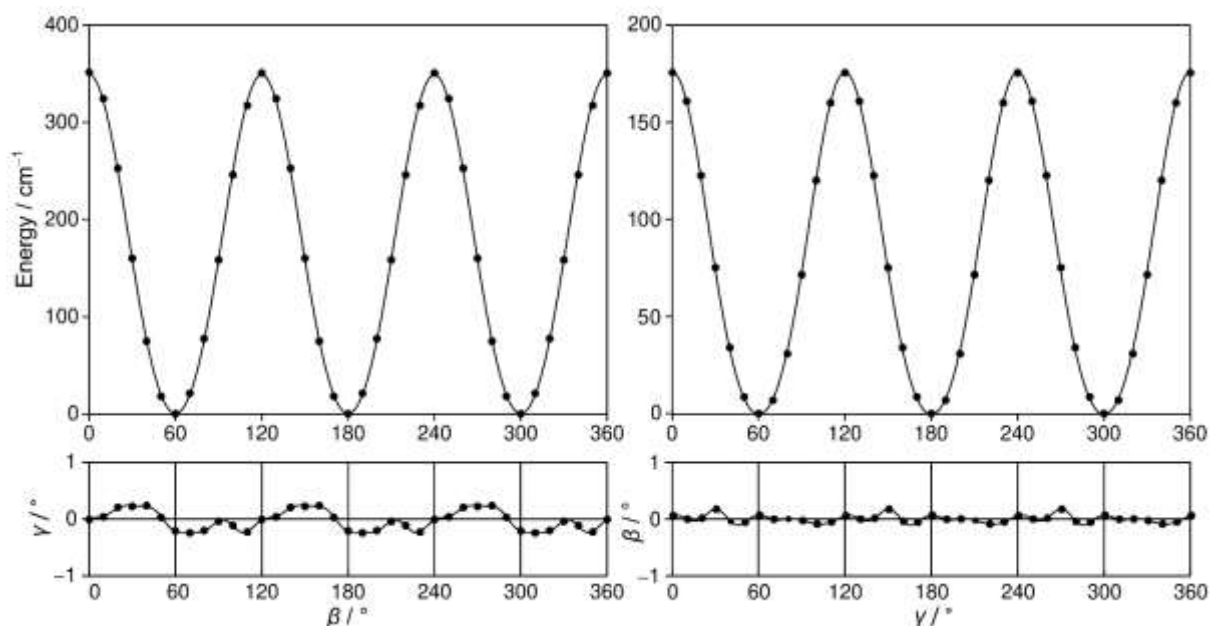

**Figure S-1: Left hand side:** The potential energy curve of *anti*-2A5MT obtained at the MP2/6-31G(d,p) level of theory by rotating the acetyl methyl group about the C6–C8 bond by varying the dihedral angle  $\beta$  in steps of  $10^\circ$ . The energies are given relative to the lowest energy with  $E = -743.3661677$  Hartree. The calculated barrier height is  $351.6 \text{ cm}^{-1}$ . The lower trace depicts the oscillation of the ring methyl group upon the rotation of the acetyl methyl group. The deviations of the dihedral angle  $\gamma$  are given relative to the value of  $179.98^\circ$  of the fully optimized geometry. **Right hand side:** The potential energy curve of *syn*-2A5MT obtained by rotating the ring methyl group about the C3–C9 bond by varying the dihedral angle  $\gamma$  in steps of  $10^\circ$ . The energies are given relative to the lowest energy with  $E = -743.3661678$  Hartree. The calculated barrier height is  $175.5 \text{ cm}^{-1}$ . The lower trace depicts the oscillation of the acetyl methyl group upon the ring methyl torsion. The deviations of the dihedral angle  $\beta$  are given relative to the values of  $0.00^\circ$  of the fully optimized geometry.

**Table S-5:** Coefficients of the two-dimensional Fourier expansion for the potential energy surface calculated at the MP2/6-31G(d,p) level of theory shown in Figure 4. Due to symmetry, only data points in the range from 0° to 120° were calculated for both  $\beta$  and  $\gamma$ . The potential is expanded as  $V(\beta, \gamma) = \sum_i f_i V_i$ . Max. dev. stands for maximum deviations between the fitted and the calculated values.

| <i>i</i> | $f_i$           | $V_i / \text{Hartree}$ |
|----------|-----------------|------------------------|
| 1        | 1               | -743.3673255           |
| 2        | $\cos(3\beta)$  | 0.0007590              |
| 3        | $\cos(3\gamma)$ | 0.0003762              |
| 4        | $\cos(6\beta)$  | 0.0001384              |
| 5        | $\cos(6\gamma)$ | 0.0000323              |
|          | Max. dev. (%)   | 8.0                    |

**Table S-6:** Observed frequencies  $\nu_{obs}$  of 427 rotational transitions of *syn*-2A5MT with  $\nu_{obs}-\nu_{calc}$  values obtained from a fit with the program *XIAM*.

| No. | <i>J</i>    | <i>K<sub>a</sub></i> | <i>K<sub>c</sub></i> | <i>J</i>    | <i>K<sub>a</sub></i> | <i>K<sub>c</sub></i> | Species | $\nu_{obs}$ | $\nu_{obs}-\nu_{calc}$ |
|-----|-------------|----------------------|----------------------|-------------|----------------------|----------------------|---------|-------------|------------------------|
|     | upper level |                      |                      | lower level |                      |                      |         | MHz         | kHz                    |
| 1   | 4           | 0                    | 4                    | 3           | 0                    | 3                    | (00)    | 6557.6150   | 0.1                    |
| 2   | 4           | 0                    | 4                    | 3           | 0                    | 3                    | (01)    | 6557.4625   | -0.5                   |
| 3   | 4           | 0                    | 4                    | 3           | 0                    | 3                    | (10)    | 6556.4996   | 0.3                    |
| 4   | 4           | 0                    | 4                    | 3           | 0                    | 3                    | (11)    | 6556.1676   | 2.1                    |
| 5   | 4           | 0                    | 4                    | 3           | 0                    | 3                    | (12)    | 6556.5281   | -0.3                   |
| 6   | 5           | 0                    | 5                    | 4           | 0                    | 4                    | (00)    | 8126.3405   | -0.8                   |
| 7   | 5           | 0                    | 5                    | 4           | 0                    | 4                    | (01)    | 8126.1754   | -0.3                   |
| 8   | 5           | 0                    | 5                    | 4           | 0                    | 4                    | (10)    | 8124.7950   | 1.1                    |
| 9   | 5           | 0                    | 5                    | 4           | 0                    | 4                    | (11)    | 8124.4691   | -0.7                   |
| 10  | 5           | 0                    | 5                    | 4           | 0                    | 4                    | (12)    | 8124.7950   | 7.8                    |
| 11  | 6           | 0                    | 6                    | 5           | 0                    | 5                    | (00)    | 9657.5524   | -1.3                   |
| 12  | 6           | 0                    | 6                    | 5           | 0                    | 5                    | (01)    | 9657.3814   | -1.2                   |
| 13  | 6           | 0                    | 6                    | 5           | 0                    | 5                    | (10)    | 9655.5293   | -1.2                   |
| 14  | 6           | 0                    | 6                    | 5           | 0                    | 5                    | (11)    | 9655.2258   | -0.7                   |
| 15  | 6           | 0                    | 6                    | 5           | 0                    | 5                    | (12)    | 9655.4940   | 0.6                    |
| 16  | 7           | 0                    | 7                    | 6           | 0                    | 6                    | (00)    | 11155.6346  | -1.5                   |
| 17  | 7           | 0                    | 7                    | 6           | 0                    | 6                    | (01)    | 11155.4632  | -2.0                   |
| 18  | 7           | 0                    | 7                    | 6           | 0                    | 6                    | (10)    | 11153.1946  | -1.6                   |
| 19  | 7           | 0                    | 7                    | 6           | 0                    | 6                    | (11)    | 11152.9114  | -0.7                   |
| 20  | 7           | 0                    | 7                    | 6           | 0                    | 6                    | (12)    | 11153.1397  | -0.3                   |
| 21  | 8           | 0                    | 8                    | 7           | 0                    | 7                    | (00)    | 12629.7351  | -2.4                   |
| 22  | 8           | 0                    | 8                    | 7           | 0                    | 7                    | (01)    | 12629.5681  | -1.9                   |
| 23  | 8           | 0                    | 8                    | 7           | 0                    | 7                    | (10)    | 12627.0447  | 0.3                    |
| 24  | 8           | 0                    | 8                    | 7           | 0                    | 7                    | (11)    | 12626.7765  | -2.5                   |
| 25  | 9           | 0                    | 9                    | 8           | 0                    | 8                    | (00)    | 14090.3852  | -0.1                   |
| 26  | 9           | 0                    | 9                    | 8           | 0                    | 8                    | (01)    | 14090.2212  | -1.8                   |
| 27  | 9           | 0                    | 9                    | 8           | 0                    | 8                    | (10)    | 14087.6369  | -2.0                   |
| 28  | 9           | 0                    | 9                    | 8           | 0                    | 8                    | (11)    | 14087.3919  | -1.5                   |
| 29  | 9           | 0                    | 9                    | 8           | 0                    | 8                    | (12)    | 14087.5598  | -2.1                   |
| 30  | 10          | 0                    | 10                   | 9           | 0                    | 9                    | (00)    | 15546.2084  | -1.0                   |
| 31  | 10          | 0                    | 10                   | 9           | 0                    | 9                    | (01)    | 15546.0510  | -1.8                   |
| 32  | 10          | 0                    | 10                   | 9           | 0                    | 9                    | (10)    | 15543.5683  | -0.5                   |
| 33  | 10          | 0                    | 10                   | 9           | 0                    | 9                    | (11)    | 15543.3444  | -0.5                   |
| 34  | 11          | 0                    | 11                   | 10          | 0                    | 10                   | (00)    | 17002.5530  | 1.6                    |
| 35  | 11          | 0                    | 11                   | 10          | 0                    | 10                   | (01)    | 17002.3983  | -2.1                   |
| 36  | 11          | 0                    | 11                   | 10          | 0                    | 10                   | (10)    | 17000.1034  | 2.0                    |
| 37  | 11          | 0                    | 11                   | 10          | 0                    | 10                   | (11)    | 16999.8980  | -1.2                   |
| 38  | 12          | 0                    | 12                   | 11          | 0                    | 11                   | (00)    | 18461.8418  | 0.4                    |
| 39  | 12          | 0                    | 12                   | 11          | 0                    | 11                   | (01)    | 18461.6951  | -0.2                   |
| 40  | 12          | 0                    | 12                   | 11          | 0                    | 11                   | (10)    | 18459.6003  | -1.8                   |
| 41  | 12          | 0                    | 12                   | 11          | 0                    | 11                   | (11)    | 18459.4195  | 0.2                    |

|    |    |   |    |    |   |    |      |            |      |
|----|----|---|----|----|---|----|------|------------|------|
| 42 | 12 | 0 | 12 | 11 | 0 | 11 | (12) | 18459.4962 | 1.7  |
| 43 | 13 | 0 | 13 | 12 | 0 | 12 | (00) | 19924.6580 | -1.2 |
| 44 | 13 | 0 | 13 | 12 | 0 | 12 | (01) | 19924.5179 | 0.4  |
| 45 | 13 | 0 | 13 | 12 | 0 | 12 | (10) | 19922.6094 | -2.4 |
| 46 | 13 | 0 | 13 | 12 | 0 | 12 | (11) | 19922.4457 | 0.5  |
| 47 | 13 | 0 | 13 | 12 | 0 | 12 | (12) | 19922.4959 | -0.5 |
| 48 | 15 | 0 | 15 | 14 | 0 | 14 | (00) | 22859.2859 | 1.9  |
| 49 | 15 | 0 | 15 | 14 | 0 | 14 | (01) | 22859.1452 | -3.6 |
| 50 | 6  | 0 | 6  | 5  | 1 | 5  | (00) | 8175.0415  | -1.0 |
| 51 | 6  | 0 | 6  | 5  | 1 | 5  | (01) | 8175.3098  | -0.1 |
| 52 | 6  | 0 | 6  | 5  | 1 | 5  | (10) | 8206.9829  | 2.5  |
| 53 | 6  | 0 | 6  | 5  | 1 | 5  | (11) | 8210.5275  | 3.1  |
| 54 | 6  | 0 | 6  | 5  | 1 | 5  | (12) | 8203.9260  | 0.1  |
| 55 | 7  | 0 | 7  | 6  | 1 | 6  | (00) | 9984.4456  | -0.2 |
| 56 | 7  | 0 | 7  | 6  | 1 | 6  | (01) | 9984.5986  | -2.0 |
| 57 | 7  | 0 | 7  | 6  | 1 | 6  | (10) | 10007.2031 | 2.6  |
| 58 | 7  | 0 | 7  | 6  | 1 | 6  | (11) | 10009.5094 | 3.7  |
| 59 | 7  | 0 | 7  | 6  | 1 | 6  | (12) | 10005.1763 | -0.9 |
| 60 | 8  | 0 | 8  | 7  | 1 | 7  | (00) | 11739.5480 | -0.8 |
| 61 | 8  | 0 | 8  | 7  | 1 | 7  | (01) | 11739.6208 | 0.2  |
| 62 | 8  | 0 | 8  | 7  | 1 | 7  | (10) | 11755.8016 | 0.1  |
| 63 | 8  | 0 | 8  | 7  | 1 | 7  | (11) | 11757.3152 | 3.1  |
| 64 | 8  | 0 | 8  | 7  | 1 | 7  | (12) | 11754.4157 | -0.4 |
| 65 | 9  | 0 | 9  | 8  | 1 | 8  | (00) | 13436.6391 | -6.9 |
| 66 | 9  | 0 | 9  | 8  | 1 | 8  | (01) | 13436.6569 | 0.1  |
| 67 | 9  | 0 | 9  | 8  | 1 | 8  | (10) | 13448.0691 | -0.1 |
| 68 | 9  | 0 | 9  | 8  | 1 | 8  | (11) | 13449.0485 | -1.2 |
| 69 | 9  | 0 | 9  | 8  | 1 | 8  | (12) | 13447.0967 | -0.8 |
| 70 | 10 | 0 | 10 | 9  | 1 | 9  | (00) | 15079.9323 | -7.2 |
| 71 | 10 | 0 | 10 | 9  | 1 | 9  | (01) | 15079.9066 | 0.7  |
| 72 | 10 | 0 | 10 | 9  | 1 | 9  | (10) | 15087.7347 | -0.5 |
| 73 | 10 | 0 | 10 | 9  | 1 | 9  | (11) | 15088.3555 | 0.5  |
| 74 | 10 | 0 | 10 | 9  | 1 | 9  | (12) | 15087.0368 | -2.6 |
| 75 | 11 | 0 | 11 | 10 | 1 | 10 | (00) | 16677.9040 | 4.0  |
| 76 | 11 | 0 | 11 | 10 | 1 | 10 | (01) | 16677.8320 | -2.9 |
| 77 | 11 | 0 | 11 | 10 | 1 | 10 | (10) | 16682.9896 | -5.0 |
| 78 | 11 | 0 | 11 | 10 | 1 | 10 | (11) | 16683.3675 | -0.3 |
| 79 | 11 | 0 | 11 | 10 | 1 | 10 | (12) | 16682.4849 | -0.3 |
| 80 | 12 | 0 | 12 | 11 | 1 | 11 | (00) | 18240.1688 | -2.1 |
| 81 | 12 | 0 | 12 | 11 | 1 | 11 | (01) | 18240.0824 | -1.5 |
| 82 | 12 | 0 | 12 | 11 | 1 | 11 | (10) | 18243.2871 | 0.0  |
| 83 | 12 | 0 | 12 | 11 | 1 | 11 | (11) | 18243.4949 | 2.5  |
| 84 | 13 | 0 | 13 | 12 | 1 | 12 | (00) | 19775.6876 | -0.2 |
| 85 | 13 | 0 | 13 | 12 | 1 | 12 | (01) | 19775.5860 | 0.0  |
| 86 | 13 | 0 | 13 | 12 | 1 | 12 | (10) | 19777.3793 | -0.7 |
| 87 | 13 | 0 | 13 | 12 | 1 | 12 | (11) | 19777.4690 | -3.3 |
| 88 | 14 | 0 | 14 | 13 | 1 | 13 | (00) | 21291.8609 | -2.0 |

|            |    |   |    |    |   |    |      |            |      |
|------------|----|---|----|----|---|----|------|------------|------|
| <b>89</b>  | 14 | 0 | 14 | 13 | 1 | 13 | (01) | 21291.7539 | 2.3  |
| <b>90</b>  | 14 | 0 | 14 | 13 | 1 | 13 | (10) | 21292.5444 | -2.9 |
| <b>91</b>  | 3  | 1 | 3  | 2  | 0 | 2  | (00) | 7051.7346  | -0.8 |
| <b>92</b>  | 3  | 1 | 3  | 2  | 0 | 2  | (01) | 7050.7847  | -1.6 |
| <b>93</b>  | 3  | 1 | 3  | 2  | 0 | 2  | (10) | 6978.4485  | -4.5 |
| <b>94</b>  | 3  | 1 | 3  | 2  | 0 | 2  | (11) | 6968.7094  | 1.2  |
| <b>95</b>  | 3  | 1 | 3  | 2  | 0 | 2  | (12) | 6986.5604  | 0.0  |
| <b>96</b>  | 4  | 1 | 4  | 3  | 0 | 3  | (00) | 8358.6082  | -0.1 |
| <b>97</b>  | 4  | 1 | 4  | 3  | 0 | 3  | (01) | 8357.8640  | -1.6 |
| <b>98</b>  | 4  | 1 | 4  | 3  | 0 | 3  | (10) | 8309.7424  | -3.6 |
| <b>99</b>  | 4  | 1 | 4  | 3  | 0 | 3  | (11) | 8303.5045  | -0.3 |
| <b>100</b> | 4  | 1 | 4  | 3  | 0 | 3  | (12) | 8314.5922  | -0.7 |
| <b>101</b> | 5  | 1 | 5  | 4  | 0 | 4  | (00) | 9608.8518  | -0.7 |
| <b>102</b> | 5  | 1 | 5  | 4  | 0 | 4  | (01) | 9608.2478  | -0.7 |
| <b>103</b> | 5  | 1 | 5  | 4  | 0 | 4  | (10) | 9573.3398  | -4.2 |
| <b>104</b> | 5  | 1 | 5  | 4  | 0 | 4  | (11) | 9569.1702  | -1.6 |
| <b>105</b> | 5  | 1 | 5  | 4  | 0 | 4  | (12) | 9576.3520  | -2.7 |
| <b>106</b> | 6  | 1 | 6  | 5  | 0 | 5  | (00) | 10828.7436 | -0.5 |
| <b>107</b> | 6  | 1 | 6  | 5  | 0 | 5  | (01) | 10828.2453 | -1.9 |
| <b>108</b> | 6  | 1 | 6  | 5  | 0 | 5  | (10) | 10801.5221 | -4.0 |
| <b>109</b> | 6  | 1 | 6  | 5  | 0 | 5  | (11) | 10798.6281 | -4.7 |
| <b>110</b> | 6  | 1 | 6  | 5  | 0 | 5  | (12) | 10803.4546 | -1.6 |
| <b>111</b> | 7  | 1 | 7  | 6  | 0 | 6  | (00) | 12045.8262 | 1.3  |
| <b>112</b> | 7  | 1 | 7  | 6  | 0 | 6  | (01) | 12045.4120 | -2.5 |
| <b>113</b> | 7  | 1 | 7  | 6  | 0 | 6  | (10) | 12024.4350 | -4.0 |
| <b>114</b> | 7  | 1 | 7  | 6  | 0 | 6  | (11) | 12022.3755 | -3.5 |
| <b>115</b> | 7  | 1 | 7  | 6  | 0 | 6  | (12) | 12025.6992 | -1.4 |
| <b>116</b> | 8  | 1 | 8  | 7  | 0 | 7  | (00) | 13283.4759 | -1.0 |
| <b>117</b> | 8  | 1 | 8  | 7  | 0 | 7  | (01) | 13283.1345 | -1.7 |
| <b>118</b> | 8  | 1 | 8  | 7  | 0 | 7  | (10) | 13266.6123 | -1.7 |
| <b>119</b> | 8  | 1 | 8  | 7  | 0 | 7  | (11) | 13265.1194 | -3.3 |
| <b>120</b> | 8  | 1 | 8  | 7  | 0 | 7  | (12) | 13267.4391 | -2.1 |
| <b>121</b> | 9  | 1 | 9  | 8  | 0 | 8  | (00) | 14556.6558 | 0.6  |
| <b>122</b> | 9  | 1 | 9  | 8  | 0 | 8  | (01) | 14556.3703 | 0.4  |
| <b>123</b> | 9  | 1 | 9  | 8  | 0 | 8  | (10) | 14543.4708 | -1.7 |
| <b>124</b> | 9  | 1 | 9  | 8  | 0 | 8  | (11) | 14542.3823 | -1.1 |
| <b>125</b> | 9  | 1 | 9  | 8  | 0 | 8  | (12) | 14544.0031 | -1.0 |
| <b>126</b> | 10 | 1 | 10 | 9  | 0 | 9  | (00) | 15870.8658 | 5.0  |
| <b>127</b> | 10 | 1 | 10 | 9  | 0 | 9  | (01) | 15870.6179 | -0.4 |
| <b>128</b> | 10 | 1 | 10 | 9  | 0 | 9  | (10) | 15860.6720 | -3.6 |
| <b>129</b> | 10 | 1 | 10 | 9  | 0 | 9  | (11) | 15859.8720 | -4.3 |
| <b>130</b> | 10 | 1 | 10 | 9  | 0 | 9  | (12) | 15860.9997 | -0.2 |
| <b>131</b> | 11 | 1 | 11 | 10 | 0 | 10 | (00) | 17224.2229 | 1.1  |
| <b>132</b> | 11 | 1 | 11 | 10 | 0 | 10 | (01) | 17224.0117 | -0.1 |
| <b>133</b> | 11 | 1 | 11 | 10 | 0 | 10 | (10) | 17216.4154 | -1.0 |
| <b>134</b> | 11 | 1 | 11 | 10 | 0 | 10 | (11) | 17215.8247 | -1.4 |
| <b>135</b> | 12 | 1 | 12 | 11 | 0 | 11 | (00) | 18610.8160 | 3.2  |

|     |    |   |    |    |   |    |      |            |      |
|-----|----|---|----|----|---|----|------|------------|------|
| 136 | 12 | 1 | 12 | 11 | 0 | 11 | (01) | 18610.6271 | 0.3  |
| 137 | 12 | 1 | 12 | 11 | 0 | 11 | (10) | 18604.8322 | -1.6 |
| 138 | 12 | 1 | 12 | 11 | 0 | 11 | (11) | 18604.3937 | 1.5  |
| 139 | 12 | 1 | 12 | 11 | 0 | 11 | (12) | 18604.9140 | 5.1  |
| 140 | 13 | 1 | 13 | 12 | 0 | 12 | (00) | 20023.4811 | 1.4  |
| 141 | 13 | 1 | 13 | 12 | 0 | 12 | (01) | 20023.3128 | 1.7  |
| 142 | 13 | 1 | 13 | 12 | 0 | 12 | (10) | 20018.8587 | 1.1  |
| 143 | 13 | 1 | 13 | 12 | 0 | 12 | (11) | 20018.5205 | 0.4  |
| 144 | 14 | 1 | 14 | 13 | 0 | 13 | (00) | 21455.5323 | 1.0  |
| 145 | 14 | 1 | 14 | 13 | 0 | 13 | (01) | 21455.3761 | 0.8  |
| 146 | 8  | 1 | 7  | 8  | 0 | 8  | (00) | 7321.6212  | -3.4 |
| 147 | 8  | 1 | 7  | 8  | 0 | 8  | (01) | 7320.1696  | -0.8 |
| 148 | 5  | 1 | 5  | 4  | 1 | 4  | (00) | 7807.8578  | -1.3 |
| 149 | 6  | 1 | 6  | 5  | 1 | 5  | (00) | 9346.2336  | 0.8  |
| 150 | 6  | 1 | 6  | 5  | 1 | 5  | (01) | 9346.1733  | -1.2 |
| 151 | 6  | 1 | 6  | 5  | 1 | 5  | (10) | 9352.9761  | 0.1  |
| 152 | 6  | 1 | 6  | 5  | 1 | 5  | (11) | 9353.9304  | -0.3 |
| 153 | 6  | 1 | 6  | 5  | 1 | 5  | (12) | 9351.8885  | -0.2 |
| 154 | 7  | 1 | 7  | 6  | 1 | 6  | (00) | 10874.6336 | -0.9 |
| 155 | 7  | 1 | 7  | 6  | 1 | 6  | (01) | 10874.5433 | -6.6 |
| 156 | 7  | 1 | 7  | 6  | 1 | 6  | (10) | 10878.4439 | 0.6  |
| 157 | 7  | 1 | 7  | 6  | 1 | 6  | (11) | 10878.9722 | -0.5 |
| 158 | 7  | 1 | 7  | 6  | 1 | 6  | (12) | 10877.7370 | -0.9 |
| 159 | 8  | 1 | 8  | 7  | 1 | 7  | (00) | 12393.2883 | 0.2  |
| 160 | 8  | 1 | 8  | 7  | 1 | 7  | (01) | 12393.1861 | -0.8 |
| 161 | 8  | 1 | 8  | 7  | 1 | 7  | (10) | 12395.3720 | 0.8  |
| 162 | 8  | 1 | 8  | 7  | 1 | 7  | (11) | 12395.6557 | -0.1 |
| 163 | 8  | 1 | 8  | 7  | 1 | 7  | (12) | 12394.8807 | 0.2  |
| 164 | 9  | 1 | 9  | 8  | 1 | 8  | (00) | 13902.9158 | -0.1 |
| 165 | 9  | 1 | 9  | 8  | 1 | 8  | (01) | 13902.8020 | -1.7 |
| 166 | 9  | 1 | 9  | 8  | 1 | 8  | (10) | 13903.9021 | -0.7 |
| 167 | 9  | 1 | 9  | 8  | 1 | 8  | (11) | 13904.0393 | -0.4 |
| 168 | 9  | 1 | 9  | 8  | 1 | 8  | (12) | 13903.5395 | -0.2 |
| 169 | 10 | 1 | 10 | 9  | 1 | 9  | (00) | 15404.5896 | -1.3 |
| 170 | 10 | 1 | 10 | 9  | 1 | 9  | (01) | 15404.4698 | -1.6 |
| 171 | 10 | 1 | 10 | 9  | 1 | 9  | (10) | 15404.8413 | -0.7 |
| 172 | 10 | 1 | 10 | 9  | 1 | 9  | (11) | 15404.8841 | -2.2 |
| 173 | 11 | 1 | 11 | 10 | 1 | 10 | (00) | 16899.5698 | -0.6 |
| 174 | 11 | 1 | 11 | 10 | 1 | 10 | (01) | 16899.4470 | 0.8  |
| 175 | 11 | 1 | 11 | 10 | 1 | 10 | (10) | 16899.3091 | -0.5 |
| 176 | 12 | 1 | 12 | 11 | 1 | 11 | (00) | 18389.1410 | -1.4 |
| 177 | 12 | 1 | 12 | 11 | 1 | 11 | (01) | 18389.0137 | -1.7 |
| 178 | 12 | 1 | 12 | 11 | 1 | 11 | (10) | 18388.5181 | -0.7 |
| 179 | 12 | 1 | 12 | 11 | 1 | 11 | (11) | 18388.4652 | -0.1 |
| 180 | 12 | 1 | 12 | 11 | 1 | 11 | (12) | 18388.3168 | -1.5 |
| 181 | 5  | 1 | 4  | 4  | 1 | 3  | (00) | 8748.2981  | -0.4 |
| 182 | 5  | 1 | 4  | 4  | 1 | 3  | (01) | 8747.9334  | -0.8 |

|            |    |   |    |    |   |   |      |            |      |
|------------|----|---|----|----|---|---|------|------------|------|
| <b>183</b> | 5  | 1 | 4  | 4  | 1 | 3 | (10) | 8734.8292  | -0.6 |
| <b>184</b> | 5  | 1 | 4  | 4  | 1 | 3 | (11) | 8732.5953  | 0.5  |
| <b>185</b> | 5  | 1 | 4  | 4  | 1 | 3 | (12) | 8736.3795  | -0.9 |
| <b>186</b> | 6  | 1 | 5  | 5  | 1 | 4 | (00) | 10464.2402 | -1.8 |
| <b>187</b> | 6  | 1 | 5  | 5  | 1 | 4 | (01) | 10463.8449 | -2.0 |
| <b>188</b> | 6  | 1 | 5  | 5  | 1 | 4 | (10) | 10455.6184 | 0.3  |
| <b>189</b> | 6  | 1 | 5  | 5  | 1 | 4 | (11) | 10453.9683 | 1.8  |
| <b>190</b> | 6  | 1 | 5  | 5  | 1 | 4 | (12) | 10456.4924 | -1.0 |
| <b>191</b> | 7  | 1 | 6  | 6  | 1 | 5 | (00) | 12158.6604 | -0.5 |
| <b>192</b> | 7  | 1 | 6  | 6  | 1 | 5 | (01) | 12158.2245 | -1.0 |
| <b>193</b> | 7  | 1 | 6  | 6  | 1 | 5 | (10) | 12152.2409 | 0.5  |
| <b>194</b> | 7  | 1 | 6  | 6  | 1 | 5 | (11) | 12150.8515 | 2.1  |
| <b>195</b> | 7  | 1 | 6  | 6  | 1 | 5 | (12) | 12152.7654 | 0.0  |
| <b>196</b> | 8  | 1 | 7  | 7  | 1 | 6 | (00) | 13825.7137 | -1.2 |
| <b>197</b> | 8  | 1 | 7  | 7  | 1 | 6 | (01) | 13825.2410 | -2.1 |
| <b>198</b> | 8  | 1 | 7  | 7  | 1 | 6 | (10) | 13820.2302 | 0.9  |
| <b>199</b> | 8  | 1 | 7  | 7  | 1 | 6 | (11) | 13818.9794 | 1.4  |
| <b>200</b> | 8  | 1 | 7  | 7  | 1 | 6 | (12) | 13820.5395 | 1.0  |
| <b>201</b> | 9  | 1 | 8  | 8  | 1 | 7 | (00) | 15459.3203 | -0.7 |
| <b>202</b> | 9  | 1 | 8  | 8  | 1 | 7 | (01) | 15458.8198 | -2.9 |
| <b>203</b> | 9  | 1 | 8  | 8  | 1 | 7 | (10) | 15454.0766 | -1.5 |
| <b>204</b> | 9  | 1 | 8  | 8  | 1 | 7 | (11) | 15452.9399 | 1.2  |
| <b>205</b> | 9  | 1 | 8  | 8  | 1 | 7 | (12) | 15454.2201 | -1.8 |
| <b>206</b> | 10 | 1 | 9  | 9  | 1 | 8 | (00) | 17054.1776 | -1.3 |
| <b>207</b> | 10 | 1 | 9  | 9  | 1 | 8 | (01) | 17053.6655 | 0.0  |
| <b>208</b> | 10 | 1 | 9  | 9  | 1 | 8 | (10) | 17048.7473 | -0.2 |
| <b>209</b> | 11 | 1 | 10 | 10 | 1 | 9 | (00) | 18607.3727 | -2.0 |
| <b>210</b> | 11 | 1 | 10 | 10 | 1 | 9 | (01) | 18606.8577 | 1.3  |
| <b>211</b> | 11 | 1 | 10 | 10 | 1 | 9 | (10) | 18601.4806 | -1.5 |
| <b>212</b> | 11 | 1 | 10 | 10 | 1 | 9 | (11) | 18600.5700 | 0.2  |
| <b>213</b> | 11 | 1 | 10 | 10 | 1 | 9 | (12) | 18601.3596 | -1.2 |
| <b>214</b> | 4  | 2 | 2  | 3  | 1 | 3 | (00) | 15244.7807 | 2.7  |
| <b>215</b> | 4  | 2 | 2  | 3  | 1 | 3 | (01) | 15253.7595 | -3.7 |
| <b>216</b> | 4  | 2 | 2  | 3  | 1 | 3 | (12) | 15703.8532 | 3.4  |
| <b>217</b> | 5  | 2 | 3  | 4  | 1 | 4 | (00) | 17481.8957 | 4.5  |
| <b>218</b> | 5  | 2 | 3  | 4  | 1 | 4 | (01) | 17484.7595 | -3.0 |
| <b>219</b> | 5  | 2 | 3  | 4  | 1 | 4 | (12) | 17841.7554 | 2.2  |
| <b>220</b> | 4  | 2 | 3  | 3  | 1 | 3 | (01) | 15080.5163 | -3.2 |
| <b>221</b> | 2  | 2 | 1  | 1  | 1 | 0 | (00) | 11101.8884 | 0.8  |
| <b>222</b> | 2  | 2 | 1  | 1  | 1 | 0 | (01) | 11060.7186 | -5.8 |
| <b>223</b> | 3  | 2 | 2  | 2  | 1 | 1 | (00) | 12576.9674 | -0.4 |
| <b>224</b> | 3  | 2 | 2  | 2  | 1 | 1 | (01) | 12550.9348 | -5.1 |
| <b>225</b> | 3  | 2 | 2  | 2  | 1 | 1 | (12) | 11963.1193 | -4.1 |
| <b>226</b> | 4  | 2 | 3  | 3  | 1 | 2 | (00) | 13955.8834 | -1.3 |
| <b>227</b> | 4  | 2 | 3  | 3  | 1 | 2 | (01) | 13943.0319 | -2.8 |
| <b>228</b> | 4  | 2 | 3  | 3  | 1 | 2 | (10) | 13384.6547 | -4.9 |
| <b>229</b> | 4  | 2 | 3  | 3  | 1 | 2 | (12) | 13432.9934 | 0.2  |



|            |    |   |    |    |   |   |      |            |      |
|------------|----|---|----|----|---|---|------|------------|------|
| <b>230</b> | 5  | 2 | 4  | 4  | 1 | 3 | (00) | 15240.2237 | -0.6 |
| <b>231</b> | 5  | 2 | 4  | 4  | 1 | 3 | (01) | 15233.3890 | -1.6 |
| <b>232</b> | 5  | 2 | 4  | 4  | 1 | 3 | (10) | 14774.2798 | -3.1 |
| <b>233</b> | 5  | 2 | 4  | 4  | 1 | 3 | (12) | 14817.3896 | 2.6  |
| <b>234</b> | 6  | 2 | 5  | 5  | 1 | 4 | (00) | 16433.5593 | 1.0  |
| <b>235</b> | 6  | 2 | 5  | 5  | 1 | 4 | (01) | 16429.2475 | -1.3 |
| <b>236</b> | 6  | 2 | 5  | 5  | 1 | 4 | (10) | 16082.0018 | -1.0 |
| <b>237</b> | 6  | 2 | 5  | 5  | 1 | 4 | (12) | 16118.1409 | 2.3  |
| <b>238</b> | 7  | 2 | 6  | 6  | 1 | 5 | (00) | 17542.2279 | 1.2  |
| <b>239</b> | 7  | 2 | 6  | 6  | 1 | 5 | (01) | 17539.1338 | -0.6 |
| <b>240</b> | 7  | 2 | 6  | 6  | 1 | 5 | (10) | 17292.6300 | -1.5 |
| <b>241</b> | 7  | 2 | 6  | 6  | 1 | 5 | (12) | 17319.7174 | 3.9  |
| <b>242</b> | 8  | 2 | 7  | 7  | 1 | 6 | (00) | 18576.2726 | 1.5  |
| <b>243</b> | 8  | 2 | 7  | 7  | 1 | 6 | (01) | 18573.8688 | -0.3 |
| <b>244</b> | 8  | 2 | 7  | 7  | 1 | 6 | (10) | 18400.8544 | -0.8 |
| <b>245</b> | 8  | 2 | 7  | 7  | 1 | 6 | (12) | 18419.4213 | 3.2  |
| <b>246</b> | 9  | 2 | 8  | 8  | 1 | 7 | (00) | 19550.3480 | 4.2  |
| <b>247</b> | 9  | 2 | 8  | 8  | 1 | 7 | (01) | 19548.3978 | 2.8  |
| <b>248</b> | 9  | 2 | 8  | 8  | 1 | 7 | (11) | 19407.6975 | 7.4  |
| <b>249</b> | 9  | 2 | 8  | 8  | 1 | 7 | (12) | 19435.8104 | 3.7  |
| <b>250</b> | 10 | 2 | 9  | 9  | 1 | 8 | (00) | 20484.2381 | 2.8  |
| <b>251</b> | 10 | 2 | 9  | 9  | 1 | 8 | (01) | 20482.6209 | 2.9  |
| <b>252</b> | 10 | 2 | 9  | 9  | 1 | 8 | (10) | 20388.9186 | 2.8  |
| <b>253</b> | 10 | 2 | 9  | 9  | 1 | 8 | (11) | 20377.8167 | 4.2  |
| <b>254</b> | 10 | 2 | 9  | 9  | 1 | 8 | (12) | 20396.9345 | 4.0  |
| <b>255</b> | 11 | 2 | 10 | 10 | 1 | 9 | (01) | 21401.0981 | 4.8  |
| <b>256</b> | 11 | 2 | 10 | 10 | 1 | 9 | (10) | 21328.2621 | 1.8  |
| <b>257</b> | 11 | 2 | 10 | 10 | 1 | 9 | (11) | 21320.4017 | 9.8  |
| <b>258</b> | 11 | 2 | 10 | 10 | 1 | 9 | (12) | 21333.5073 | 4.6  |
| <b>259</b> | 2  | 2 | 1  | 2  | 1 | 2 | (00) | 8151.7294  | 6.2  |
| <b>260</b> | 2  | 2 | 1  | 2  | 1 | 2 | (10) | 7687.1121  | -1.0 |
| <b>261</b> | 2  | 2 | 1  | 2  | 1 | 2 | (12) | 7712.8350  | -1.8 |
| <b>262</b> | 4  | 2 | 3  | 4  | 1 | 4 | (00) | 8832.9001  | -1.5 |
| <b>263</b> | 4  | 2 | 3  | 4  | 1 | 4 | (01) | 8820.5540  | -1.7 |
| <b>264</b> | 4  | 2 | 3  | 4  | 1 | 4 | (10) | 8365.6140  | 0.1  |
| <b>265</b> | 4  | 2 | 3  | 4  | 1 | 4 | (12) | 8398.9048  | 1.7  |
| <b>266</b> | 5  | 2 | 4  | 5  | 1 | 5 | (00) | 9325.3494  | 0.6  |
| <b>267</b> | 5  | 2 | 4  | 5  | 1 | 5 | (01) | 9318.6528  | -3.5 |
| <b>268</b> | 5  | 2 | 4  | 5  | 1 | 5 | (10) | 8926.7637  | 5.2  |
| <b>269</b> | 5  | 2 | 4  | 5  | 1 | 5 | (12) | 8959.5405  | -0.8 |
| <b>270</b> | 6  | 2 | 5  | 6  | 1 | 6 | (00) | 9920.7550  | 6.6  |
| <b>271</b> | 6  | 2 | 5  | 6  | 1 | 6 | (01) | 9916.2765  | 2.2  |
| <b>272</b> | 6  | 2 | 5  | 6  | 1 | 6 | (10) | 9616.3320  | -0.3 |
| <b>273</b> | 6  | 2 | 5  | 6  | 1 | 6 | (12) | 9644.7861  | 1.5  |
| <b>274</b> | 7  | 2 | 6  | 7  | 1 | 7 | (00) | 10619.0277 | 3.4  |
| <b>275</b> | 7  | 2 | 6  | 7  | 1 | 7 | (01) | 10615.4562 | -0.6 |
| <b>276</b> | 7  | 2 | 6  | 7  | 1 | 7 | (10) | 10404.1299 | -5.9 |

|            |    |   |    |    |   |   |      |            |      |
|------------|----|---|----|----|---|---|------|------------|------|
| <b>277</b> | 7  | 2 | 6  | 7  | 1 | 7 | (11) | 10377.7589 | 10.0 |
| <b>278</b> | 7  | 2 | 6  | 7  | 1 | 7 | (12) | 10425.1169 | 1.8  |
| <b>279</b> | 8  | 2 | 7  | 8  | 1 | 8 | (00) | 11418.4458 | 4.4  |
| <b>280</b> | 8  | 2 | 7  | 8  | 1 | 8 | (01) | 11415.2297 | -0.5 |
| <b>281</b> | 8  | 2 | 7  | 8  | 1 | 8 | (10) | 11269.2239 | -4.8 |
| <b>282</b> | 8  | 2 | 7  | 8  | 1 | 8 | (12) | 11282.7084 | 3.9  |
| <b>283</b> | 5  | 2 | 3  | 4  | 2 | 2 | (00) | 8496.9987  | 0.1  |
| <b>284</b> | 5  | 2 | 3  | 4  | 2 | 2 | (01) | 8490.9627  | -0.4 |
| <b>285</b> | 5  | 2 | 3  | 4  | 2 | 2 | (10) | 8416.4825  | -1.4 |
| <b>286</b> | 5  | 2 | 3  | 4  | 2 | 2 | (11) | 8414.5496  | -0.4 |
| <b>287</b> | 5  | 2 | 3  | 4  | 2 | 2 | (12) | 8418.2337  | -1.5 |
| <b>288</b> | 6  | 2 | 4  | 5  | 2 | 3 | (00) | 10271.4562 | 0.0  |
| <b>289</b> | 6  | 2 | 4  | 5  | 2 | 3 | (01) | 10268.8126 | 0.5  |
| <b>290</b> | 6  | 2 | 4  | 5  | 2 | 3 | (10) | 10171.2451 | -0.4 |
| <b>291</b> | 7  | 2 | 5  | 6  | 2 | 4 | (00) | 12068.4516 | 1.4  |
| <b>292</b> | 7  | 2 | 5  | 6  | 2 | 4 | (01) | 12067.0519 | 2.3  |
| <b>293</b> | 7  | 2 | 5  | 6  | 2 | 4 | (10) | 11975.9092 | -3.2 |
| <b>294</b> | 6  | 2 | 5  | 5  | 2 | 4 | (00) | 9941.6318  | -0.7 |
| <b>295</b> | 6  | 2 | 5  | 5  | 2 | 4 | (01) | 9943.7931  | 0.7  |
| <b>296</b> | 6  | 2 | 5  | 5  | 2 | 4 | (10) | 10042.5508 | 1.0  |
| <b>297</b> | 6  | 2 | 5  | 5  | 2 | 4 | (11) | 10047.0351 | -2.0 |
| <b>298</b> | 6  | 2 | 5  | 5  | 2 | 4 | (12) | 10037.1327 | 0.6  |
| <b>299</b> | 7  | 2 | 6  | 6  | 2 | 5 | (00) | 11572.9107 | 0.3  |
| <b>300</b> | 7  | 2 | 6  | 6  | 2 | 5 | (01) | 11573.7327 | 0.2  |
| <b>301</b> | 7  | 2 | 6  | 6  | 2 | 5 | (10) | 11666.2480 | 1.2  |
| <b>302</b> | 7  | 2 | 6  | 6  | 2 | 5 | (11) | 11673.5155 | -4.3 |
| <b>303</b> | 7  | 2 | 6  | 6  | 2 | 5 | (12) | 11658.0685 | 0.2  |
| <b>304</b> | 8  | 2 | 7  | 7  | 2 | 6 | (00) | 13192.7059 | 0.7  |
| <b>305</b> | 8  | 2 | 7  | 7  | 2 | 6 | (01) | 13192.9604 | 0.1  |
| <b>306</b> | 8  | 2 | 7  | 7  | 2 | 6 | (10) | 13260.4653 | 1.2  |
| <b>307</b> | 8  | 2 | 7  | 7  | 2 | 6 | (11) | 13267.8829 | -3.9 |
| <b>308</b> | 8  | 2 | 7  | 7  | 2 | 6 | (12) | 13252.4694 | -0.5 |
| <b>309</b> | 9  | 2 | 8  | 8  | 2 | 7 | (00) | 14799.7883 | 0.6  |
| <b>310</b> | 9  | 2 | 8  | 8  | 2 | 7 | (01) | 14799.7642 | -4.8 |
| <b>311</b> | 9  | 2 | 8  | 8  | 2 | 7 | (10) | 14842.9312 | 1.5  |
| <b>312</b> | 9  | 2 | 8  | 8  | 2 | 7 | (11) | 14848.5052 | -2.1 |
| <b>313</b> | 9  | 2 | 8  | 8  | 2 | 7 | (12) | 14836.9263 | -0.9 |
| <b>314</b> | 10 | 2 | 9  | 9  | 2 | 8 | (00) | 16393.2112 | -1.2 |
| <b>315</b> | 10 | 2 | 9  | 9  | 2 | 8 | (01) | 16393.0461 | 0.4  |
| <b>316</b> | 10 | 2 | 9  | 9  | 2 | 8 | (10) | 16419.4386 | 0.2  |
| <b>317</b> | 10 | 2 | 9  | 9  | 2 | 8 | (11) | 16423.0586 | -2.5 |
| <b>318</b> | 10 | 2 | 9  | 9  | 2 | 8 | (12) | 16415.3452 | -0.4 |
| <b>319</b> | 11 | 2 | 10 | 10 | 2 | 9 | (00) | 17972.3952 | -0.5 |
| <b>320</b> | 11 | 2 | 10 | 10 | 2 | 9 | (01) | 17972.1412 | 0.4  |
| <b>321</b> | 11 | 2 | 10 | 10 | 2 | 9 | (10) | 17988.0908 | -1.2 |
| <b>322</b> | 11 | 2 | 10 | 10 | 2 | 9 | (11) | 17990.2991 | -2.4 |
| <b>323</b> | 11 | 2 | 10 | 10 | 2 | 9 | (12) | 17985.3208 | 0.8  |

|            |   |   |   |   |   |   |      |            |       |
|------------|---|---|---|---|---|---|------|------------|-------|
| <b>324</b> | 3 | 3 | 1 | 2 | 2 | 0 | (00) | 18102.1494 | -2.2  |
| <b>325</b> | 4 | 3 | 2 | 3 | 2 | 1 | (00) | 19745.4348 | -1.4  |
| <b>326</b> | 5 | 3 | 3 | 4 | 2 | 2 | (00) | 21348.9383 | -0.3  |
| <b>327</b> | 3 | 3 | 0 | 2 | 2 | 1 | (00) | 18112.7617 | -2.4  |
| <b>328</b> | 4 | 3 | 1 | 3 | 2 | 2 | (00) | 19798.9903 | -1.2  |
| <b>329</b> | 5 | 3 | 2 | 4 | 2 | 3 | (00) | 21510.6267 | -0.4  |
| <b>330</b> | 6 | 3 | 3 | 5 | 2 | 4 | (00) | 23264.4563 | 1.2   |
| <b>331</b> | 3 | 3 | 0 | 3 | 2 | 1 | (00) | 13067.7714 | 0.6   |
| <b>332</b> | 3 | 3 | 0 | 3 | 2 | 1 | (01) | 13104.0048 | 5.7   |
| <b>333</b> | 3 | 3 | 0 | 3 | 2 | 1 | (10) | 13318.1201 | -9.3  |
| <b>334</b> | 4 | 3 | 1 | 4 | 2 | 2 | (00) | 12996.4916 | -7.0  |
| <b>335</b> | 4 | 3 | 1 | 4 | 2 | 2 | (01) | 13044.4298 | -7.0  |
| <b>336</b> | 4 | 3 | 1 | 4 | 2 | 2 | (10) | 13293.2651 | -5.2  |
| <b>337</b> | 4 | 3 | 1 | 4 | 2 | 2 | (12) | 13268.8990 | -8.3  |
| <b>338</b> | 5 | 3 | 2 | 5 | 2 | 3 | (00) | 12861.6355 | -2.0  |
| <b>339</b> | 5 | 3 | 2 | 5 | 2 | 3 | (01) | 12911.8650 | -2.6  |
| <b>340</b> | 5 | 3 | 2 | 5 | 2 | 3 | (10) | 13234.0452 | -1.9  |
| <b>341</b> | 5 | 3 | 2 | 5 | 2 | 3 | (12) | 13207.8057 | -6.7  |
| <b>342</b> | 6 | 3 | 3 | 6 | 2 | 4 | (00) | 12644.3159 | 0.2   |
| <b>343</b> | 6 | 3 | 3 | 6 | 2 | 4 | (01) | 12688.6471 | -1.2  |
| <b>344</b> | 6 | 3 | 3 | 6 | 2 | 4 | (10) | 13105.4014 | 1.0   |
| <b>345</b> | 6 | 3 | 3 | 6 | 2 | 4 | (12) | 13074.3549 | -4.6  |
| <b>346</b> | 7 | 3 | 4 | 7 | 2 | 5 | (00) | 12335.8003 | 4.5   |
| <b>347</b> | 7 | 3 | 4 | 7 | 2 | 5 | (01) | 12367.5601 | -3.0  |
| <b>348</b> | 7 | 3 | 4 | 7 | 2 | 5 | (10) | 12865.5908 | 6.2   |
| <b>349</b> | 7 | 3 | 4 | 7 | 2 | 5 | (12) | 12827.1842 | 0.2   |
| <b>350</b> | 8 | 3 | 5 | 8 | 2 | 6 | (00) | 11943.1300 | 5.1   |
| <b>351</b> | 8 | 3 | 5 | 8 | 2 | 6 | (01) | 11961.1336 | -0.8  |
| <b>352</b> | 8 | 3 | 5 | 8 | 2 | 6 | (10) | 12496.5742 | 10.8  |
| <b>353</b> | 8 | 3 | 5 | 8 | 2 | 6 | (12) | 12451.3147 | 1.7   |
| <b>354</b> | 6 | 3 | 4 | 6 | 2 | 4 | (01) | 12560.4294 | -1.2  |
| <b>355</b> | 3 | 3 | 1 | 3 | 2 | 2 | (00) | 13118.5457 | -0.3  |
| <b>356</b> | 3 | 3 | 1 | 3 | 2 | 2 | (01) | 13076.4492 | 4.0   |
| <b>357</b> | 4 | 3 | 2 | 4 | 2 | 3 | (00) | 13146.0467 | -10.7 |
| <b>358</b> | 4 | 3 | 2 | 4 | 2 | 3 | (01) | 13092.2471 | -2.3  |
| <b>359</b> | 5 | 3 | 3 | 5 | 2 | 4 | (00) | 13200.6245 | 1.2   |
| <b>360</b> | 5 | 3 | 3 | 5 | 2 | 4 | (01) | 13144.5275 | -2.5  |
| <b>361</b> | 6 | 3 | 4 | 6 | 2 | 5 | (00) | 13293.8937 | 0.4   |
| <b>362</b> | 6 | 3 | 4 | 6 | 2 | 5 | (01) | 13243.7099 | -0.7  |
| <b>363</b> | 7 | 3 | 5 | 7 | 2 | 6 | (00) | 13438.1755 | 2.8   |
| <b>364</b> | 7 | 3 | 5 | 7 | 2 | 6 | (01) | 13400.5763 | -1.3  |
| <b>365</b> | 8 | 3 | 6 | 8 | 2 | 7 | (00) | 13645.6944 | 1.9   |
| <b>366</b> | 8 | 3 | 6 | 8 | 2 | 7 | (01) | 13621.8919 | 2.1   |
| <b>367</b> | 5 | 3 | 3 | 4 | 2 | 2 | (00) | 21348.9381 | -0.5  |
| <b>368</b> | 5 | 3 | 3 | 4 | 2 | 2 | (01) | 21277.2348 | 1.9   |
| <b>369</b> | 6 | 3 | 4 | 5 | 2 | 3 | (00) | 22886.8430 | 0.6   |
| <b>370</b> | 6 | 3 | 4 | 5 | 2 | 3 | (01) | 22829.2407 | -2.0  |

|            |   |   |   |   |   |   |      |            |      |
|------------|---|---|---|---|---|---|------|------------|------|
| <b>371</b> | 5 | 3 | 3 | 4 | 3 | 2 | (00) | 8354.8742  | 2.0  |
| <b>372</b> | 6 | 3 | 4 | 5 | 3 | 3 | (00) | 10034.9051 | 2.7  |
| <b>373</b> | 6 | 3 | 4 | 5 | 3 | 3 | (01) | 10042.9756 | 2.7  |
| <b>374</b> | 6 | 3 | 4 | 5 | 3 | 3 | (10) | 10046.2123 | -0.5 |
| <b>375</b> | 6 | 3 | 4 | 5 | 3 | 3 | (11) | 10046.1744 | 2.1  |
| <b>376</b> | 6 | 3 | 4 | 5 | 3 | 3 | (12) | 10045.7794 | -1.0 |
| <b>377</b> | 7 | 3 | 5 | 6 | 3 | 4 | (00) | 11717.1916 | 1.8  |
| <b>378</b> | 6 | 3 | 3 | 5 | 3 | 2 | (00) | 10054.1375 | 3.2  |
| <b>379</b> | 6 | 3 | 3 | 5 | 3 | 2 | (01) | 10045.5930 | 0.3  |
| <b>380</b> | 6 | 3 | 3 | 5 | 3 | 2 | (10) | 10042.5993 | 0.6  |
| <b>381</b> | 4 | 4 | 0 | 4 | 3 | 1 | (00) | 18336.8924 | 1.2  |
| <b>382</b> | 4 | 4 | 0 | 4 | 3 | 1 | (01) | 18354.8502 | 3.6  |
| <b>383</b> | 4 | 4 | 1 | 4 | 3 | 2 | (00) | 18339.3122 | -1.4 |
| <b>384</b> | 4 | 4 | 1 | 4 | 3 | 2 | (01) | 18313.1564 | 6.7  |
| <b>385</b> | 5 | 4 | 2 | 5 | 3 | 3 | (00) | 18330.3416 | -8.1 |
| <b>386</b> | 5 | 4 | 2 | 5 | 3 | 3 | (01) | 18300.7197 | -3.2 |
| <b>387</b> | 6 | 4 | 3 | 6 | 3 | 4 | (00) | 18317.9510 | -4.5 |
| <b>388</b> | 6 | 4 | 3 | 6 | 3 | 4 | (01) | 18280.2716 | -0.5 |
| <b>389</b> | 7 | 4 | 4 | 7 | 3 | 5 | (00) | 18303.7482 | -0.7 |
| <b>390</b> | 7 | 4 | 4 | 7 | 3 | 5 | (01) | 18253.0651 | -2.4 |
| <b>391</b> | 8 | 4 | 5 | 8 | 3 | 6 | (00) | 18291.2675 | 7.0  |
| <b>392</b> | 8 | 4 | 5 | 8 | 3 | 6 | (01) | 18227.9332 | 1.9  |
| <b>393</b> | 9 | 4 | 6 | 9 | 3 | 7 | (00) | 18286.2245 | 6.2  |
| <b>394</b> | 9 | 4 | 6 | 9 | 3 | 7 | (01) | 18216.9769 | 3.3  |
| <b>395</b> | 6 | 4 | 2 | 5 | 4 | 1 | (00) | 10022.8666 | 7.2  |
| <b>396</b> | 6 | 4 | 2 | 5 | 4 | 1 | (01) | 10022.3802 | -1.3 |
| <b>397</b> | 6 | 4 | 2 | 5 | 4 | 1 | (10) | 10021.6967 | 1.2  |
| <b>398</b> | 6 | 4 | 2 | 5 | 4 | 1 | (11) | 10021.4084 | 4.0  |
| <b>399</b> | 6 | 4 | 2 | 5 | 4 | 1 | (12) | 10021.5244 | 2.1  |
| <b>400</b> | 7 | 4 | 3 | 6 | 4 | 2 | (00) | 11704.1500 | 0.8  |
| <b>401</b> | 7 | 4 | 3 | 6 | 4 | 2 | (01) | 11703.1996 | 7.3  |
| <b>402</b> | 7 | 4 | 3 | 6 | 4 | 2 | (10) | 11702.1573 | 2.6  |
| <b>403</b> | 7 | 4 | 3 | 6 | 4 | 2 | (11) | 11701.7957 | 3.6  |
| <b>404</b> | 7 | 4 | 3 | 6 | 4 | 2 | (12) | 11701.9728 | 0.9  |
| <b>405</b> | 8 | 4 | 4 | 7 | 4 | 3 | (00) | 13390.9302 | 5.0  |
| <b>406</b> | 8 | 4 | 4 | 7 | 4 | 3 | (01) | 13388.8996 | 2.2  |
| <b>407</b> | 8 | 4 | 4 | 7 | 4 | 3 | (10) | 13387.3739 | 0.9  |
| <b>408</b> | 8 | 4 | 4 | 7 | 4 | 3 | (11) | 13386.9303 | 2.4  |
| <b>409</b> | 8 | 4 | 4 | 7 | 4 | 3 | (12) | 13387.1931 | 3.2  |
| <b>410</b> | 9 | 4 | 5 | 8 | 4 | 4 | (00) | 15084.5591 | 5.0  |
| <b>411</b> | 9 | 4 | 5 | 8 | 4 | 4 | (10) | 15078.1214 | 5.9  |
| <b>412</b> | 6 | 4 | 3 | 5 | 4 | 2 | (01) | 10022.5244 | 2.3  |
| <b>413</b> | 6 | 4 | 3 | 5 | 4 | 2 | (10) | 10023.1795 | 0.6  |
| <b>414</b> | 6 | 4 | 3 | 5 | 4 | 2 | (11) | 10023.0299 | -0.1 |
| <b>415</b> | 7 | 4 | 4 | 6 | 4 | 3 | (00) | 11702.9854 | 2.2  |
| <b>416</b> | 7 | 4 | 4 | 6 | 4 | 3 | (01) | 11703.3984 | 3.5  |
| <b>417</b> | 7 | 4 | 4 | 6 | 4 | 3 | (10) | 11704.4884 | 3.4  |

---

|            |   |   |   |   |   |   |      |            |      |
|------------|---|---|---|---|---|---|------|------------|------|
| <b>418</b> | 7 | 4 | 4 | 6 | 4 | 3 | (11) | 11704.3353 | 1.7  |
| <b>419</b> | 7 | 4 | 4 | 6 | 4 | 3 | (12) | 11704.0945 | 4.1  |
| <b>420</b> | 8 | 4 | 5 | 7 | 4 | 4 | (00) | 13387.7405 | 3.9  |
| <b>421</b> | 8 | 4 | 5 | 7 | 4 | 4 | (01) | 13389.1385 | 2.3  |
| <b>422</b> | 8 | 4 | 5 | 7 | 4 | 4 | (10) | 13390.8384 | 1.0  |
| <b>423</b> | 8 | 4 | 5 | 7 | 4 | 4 | (11) | 13390.6908 | -4.0 |
| <b>424</b> | 8 | 4 | 5 | 7 | 4 | 4 | (12) | 13390.3521 | 1.1  |
| <b>425</b> | 9 | 4 | 6 | 8 | 4 | 5 | (00) | 15076.9689 | 4.3  |
| <b>426</b> | 9 | 4 | 6 | 8 | 4 | 5 | (10) | 15083.0464 | 3.1  |
| <b>427</b> | 9 | 4 | 6 | 8 | 4 | 5 | (11) | 15082.9237 | 0.1  |

---
